# Supplementary material
Source: publisher figshare collection journal article supplement (https://future-science-group.figshare.com/articles/dataset/_/21205523)
Supplement: Supplementary file 1 [file 1]

**Kidney Tissue Engineering in Preclinical Models of Renal Failure: A Systematic Review and Meta-analysis**

**PAX2 analysis**

**Forest plot:**


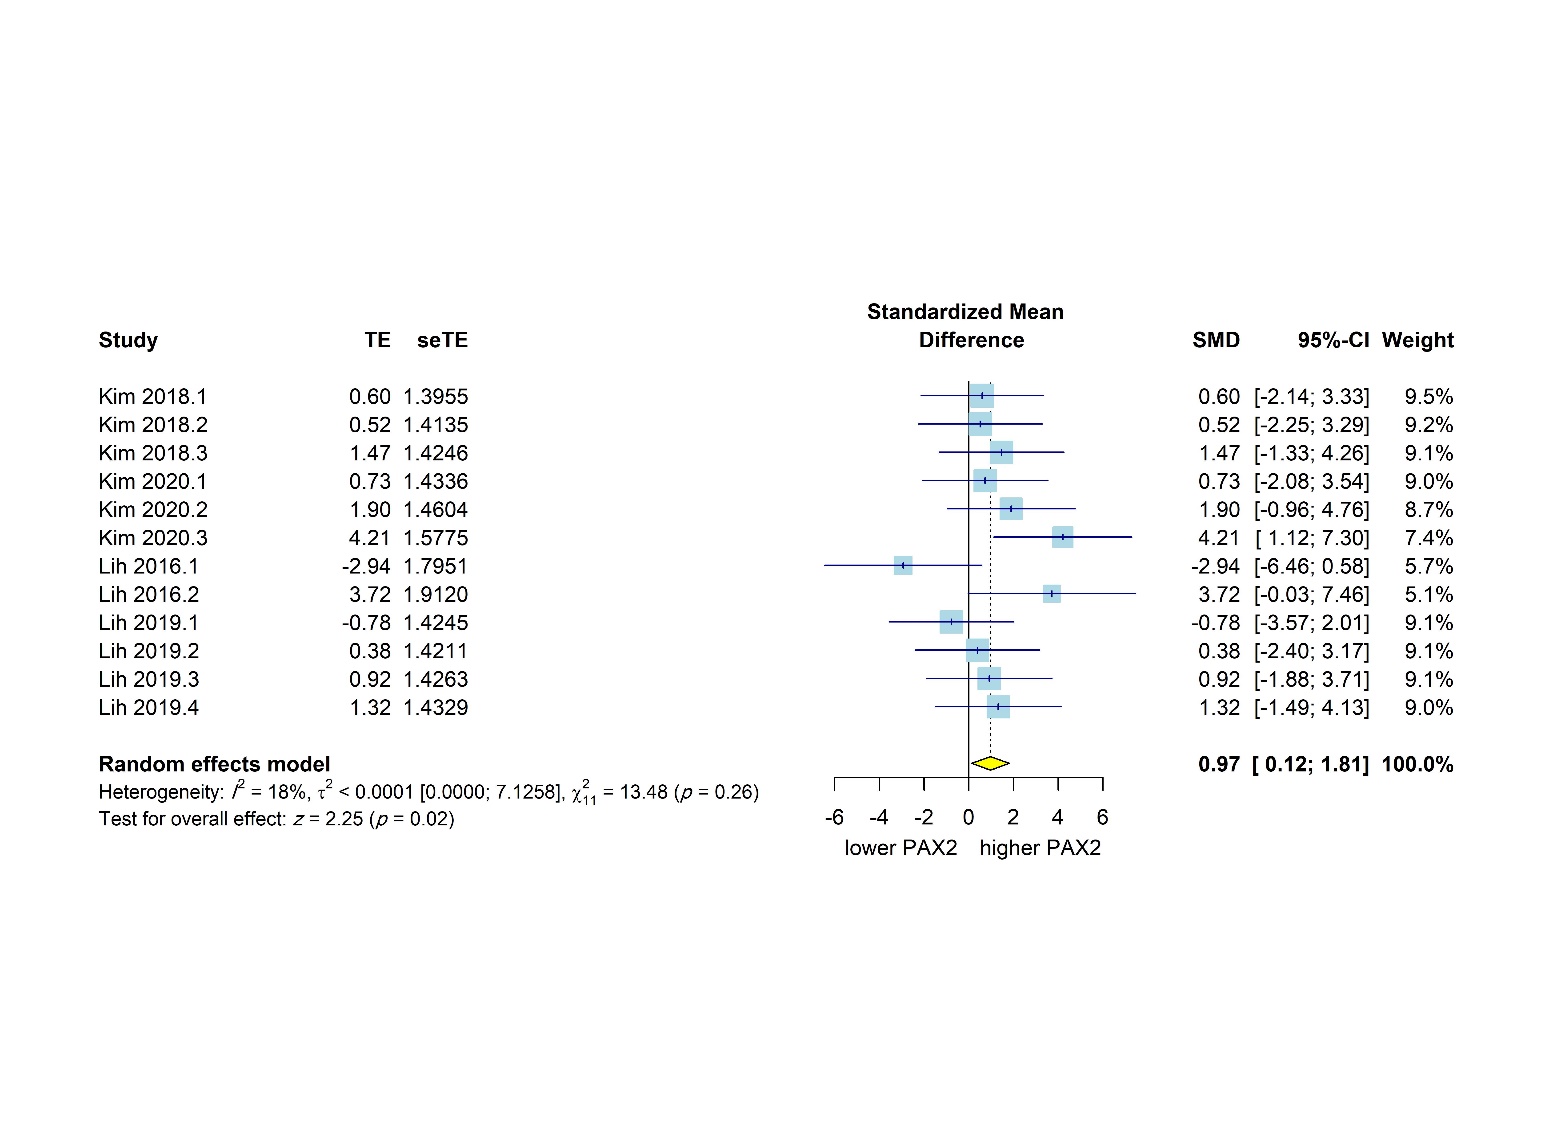


**Funnel plot:**


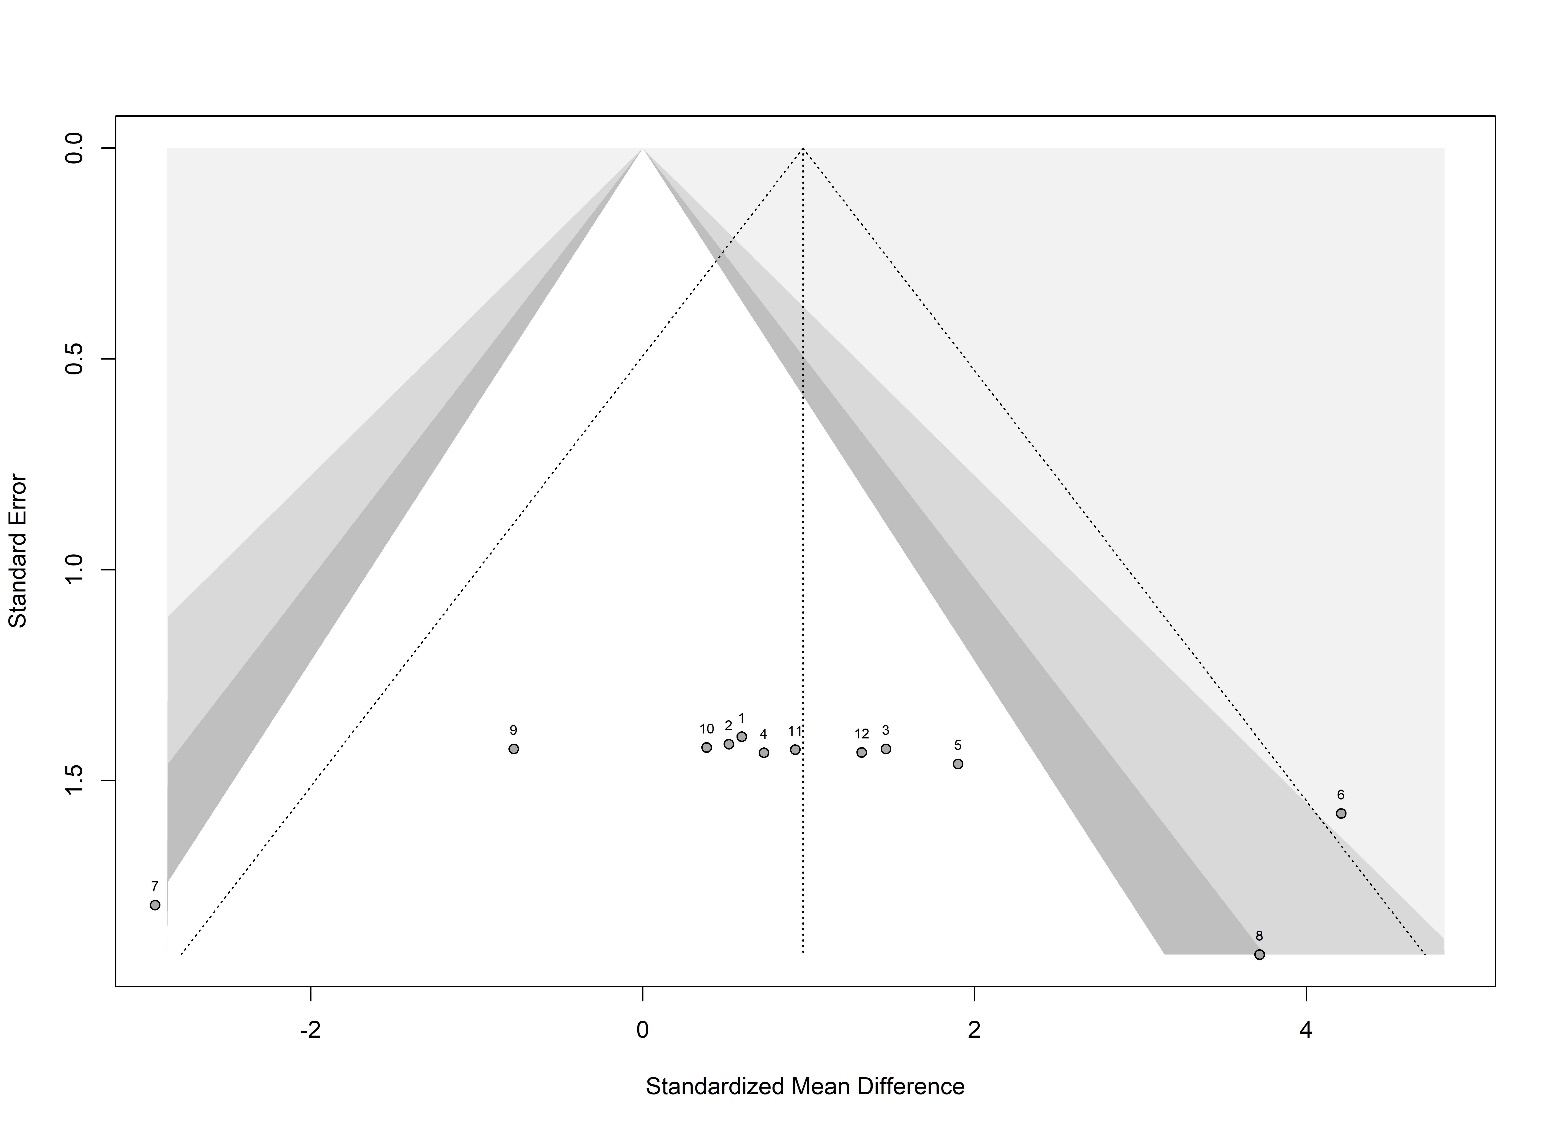


**Heterogeneity:**


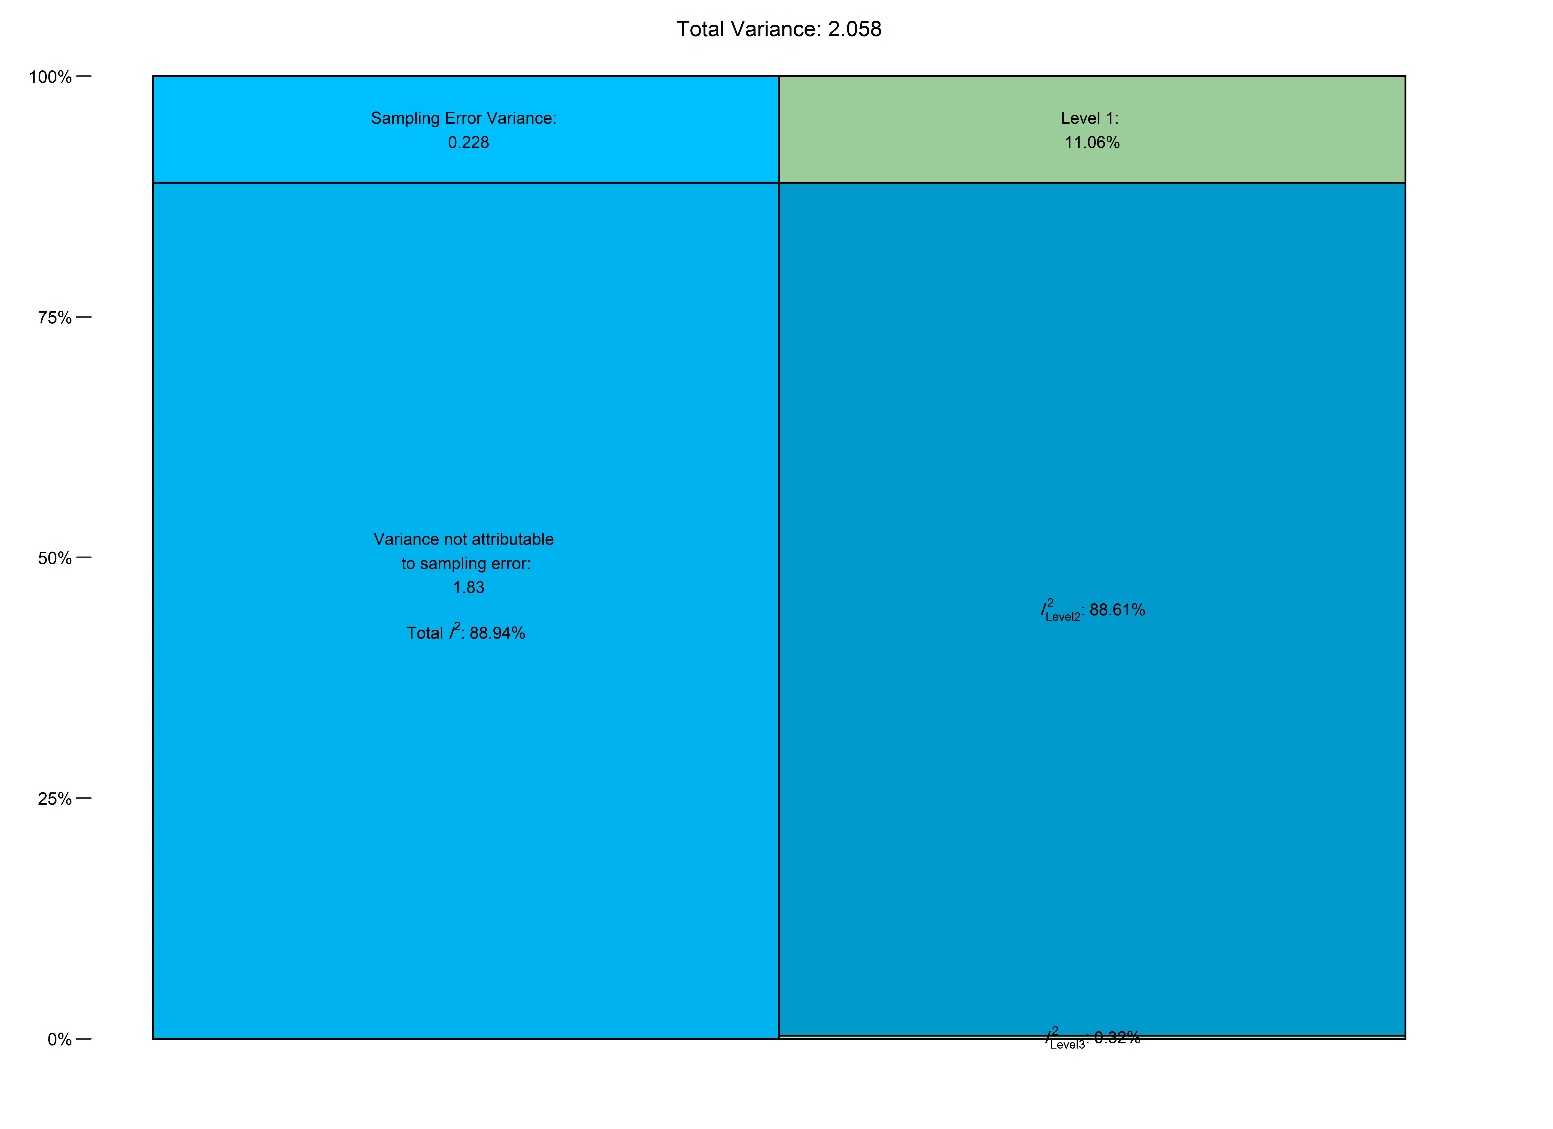


**Sensitivity analysis:**


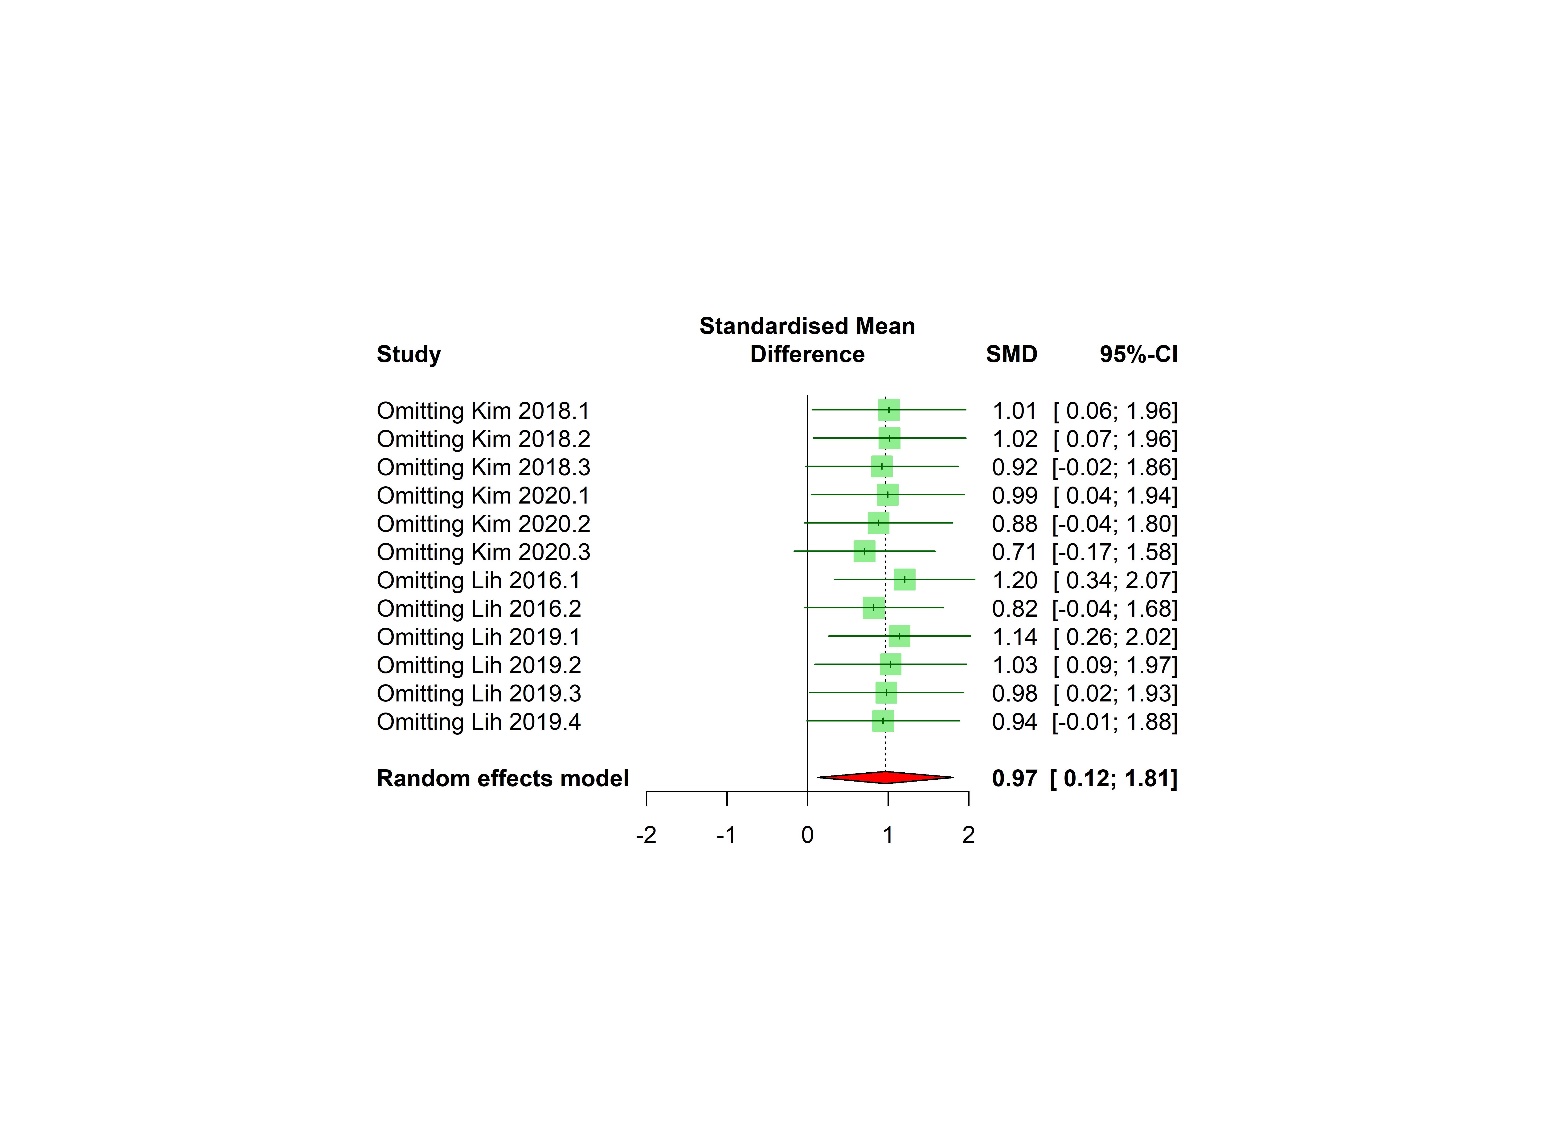


**Col-1 analysis**

**Forest plot:**

**
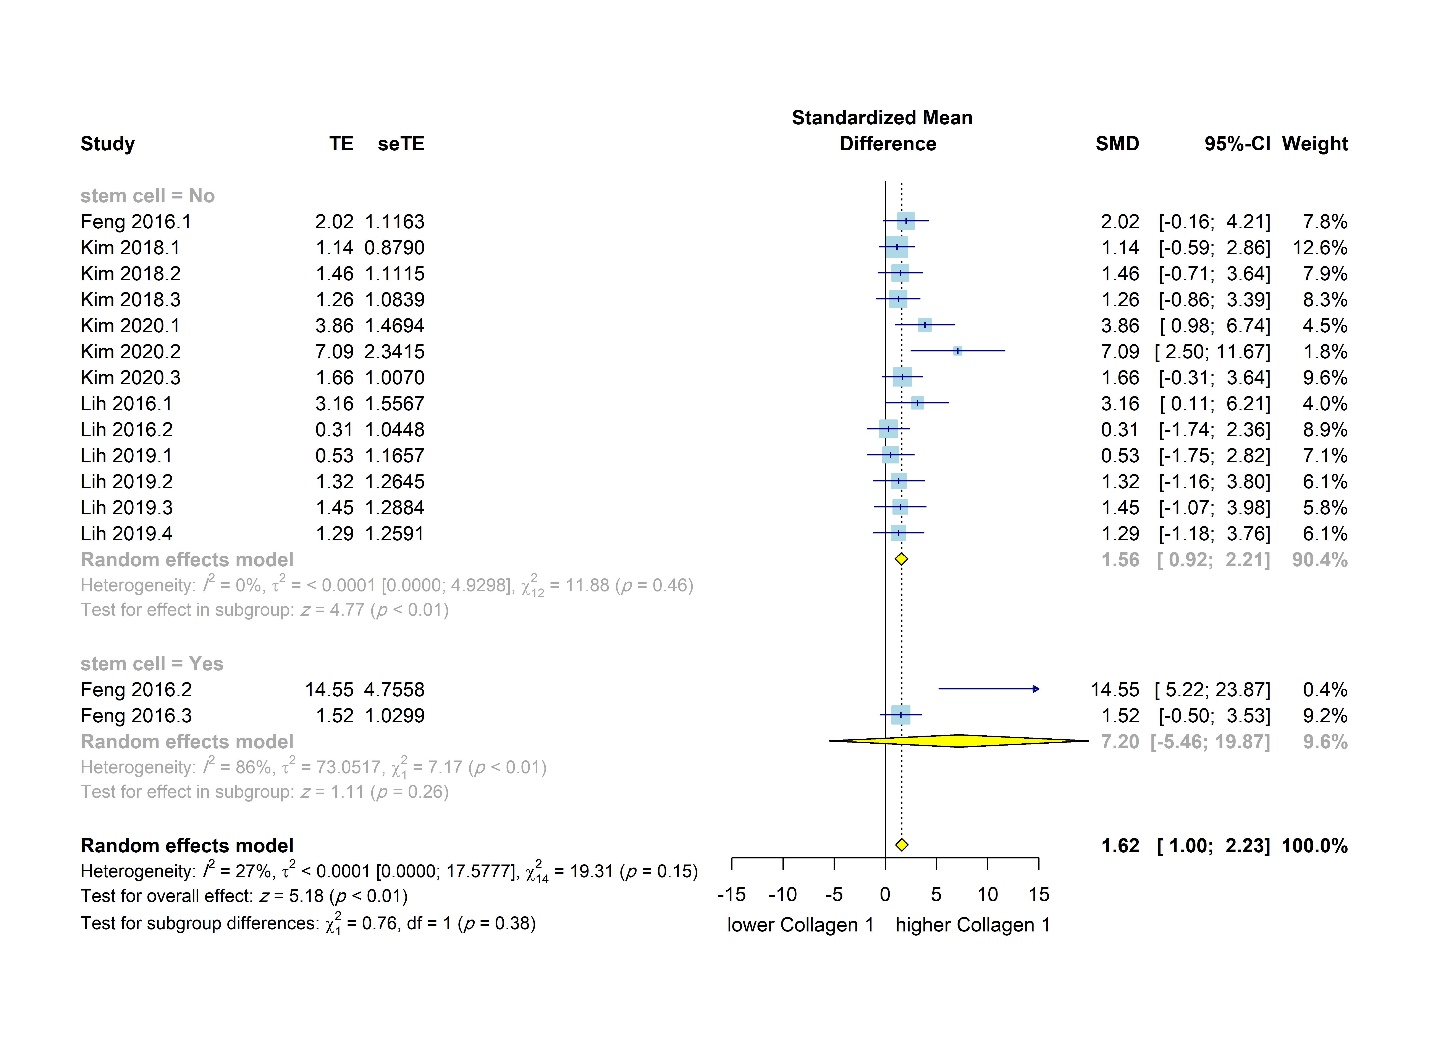
**

**
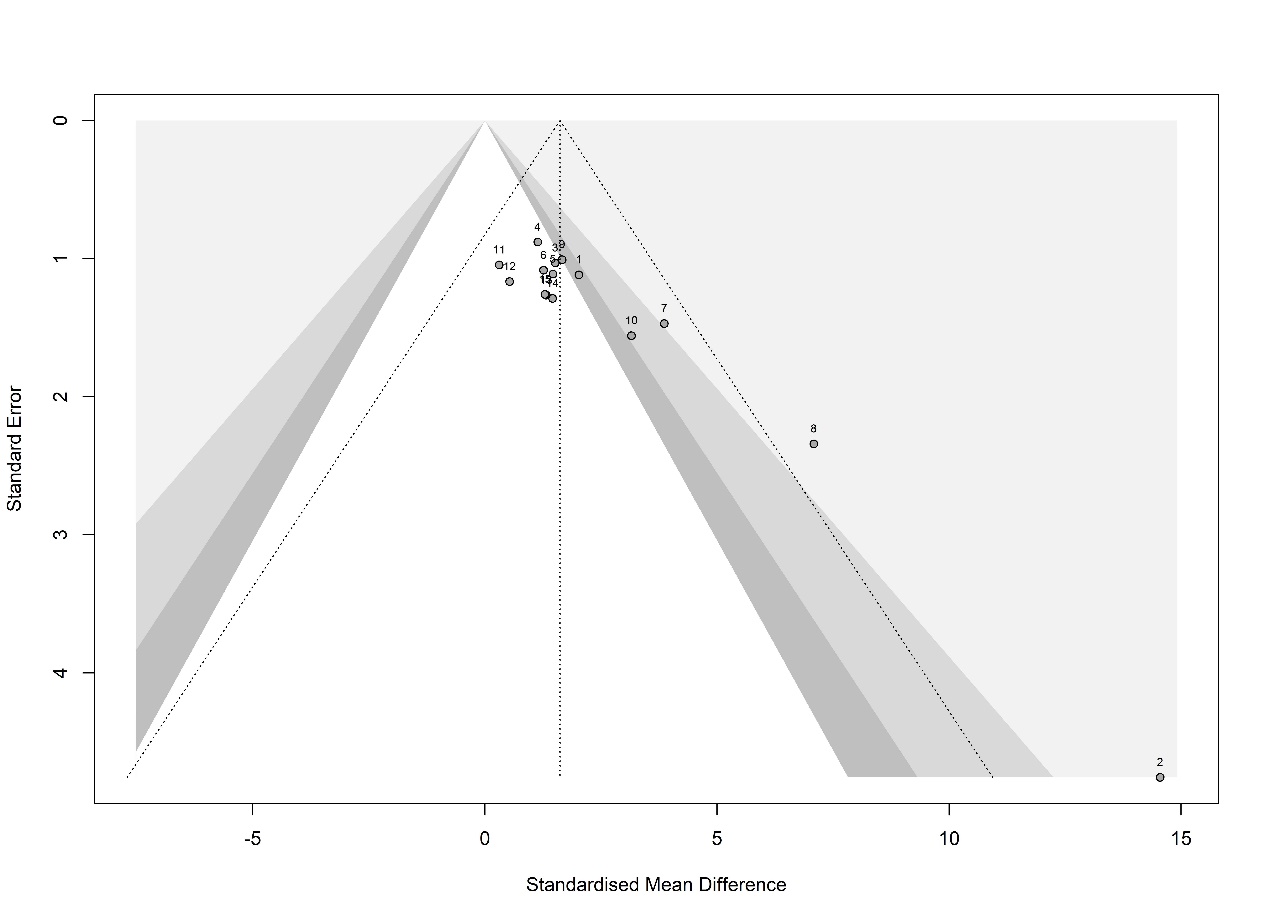
Funnel plot:**

**Heterogeneity:**

**
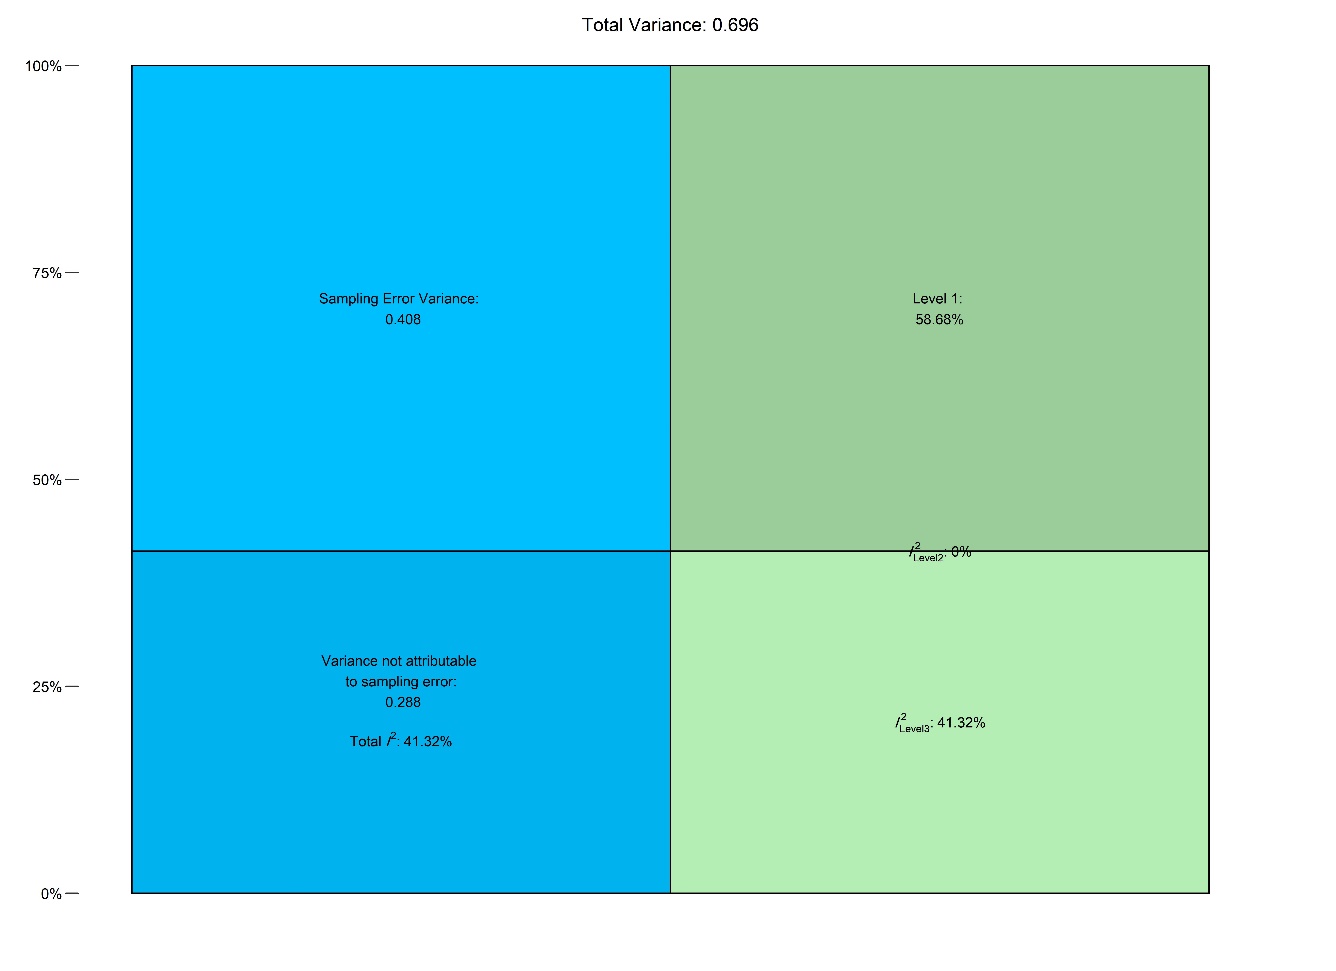
**

**Sensitivity analysis:**

**
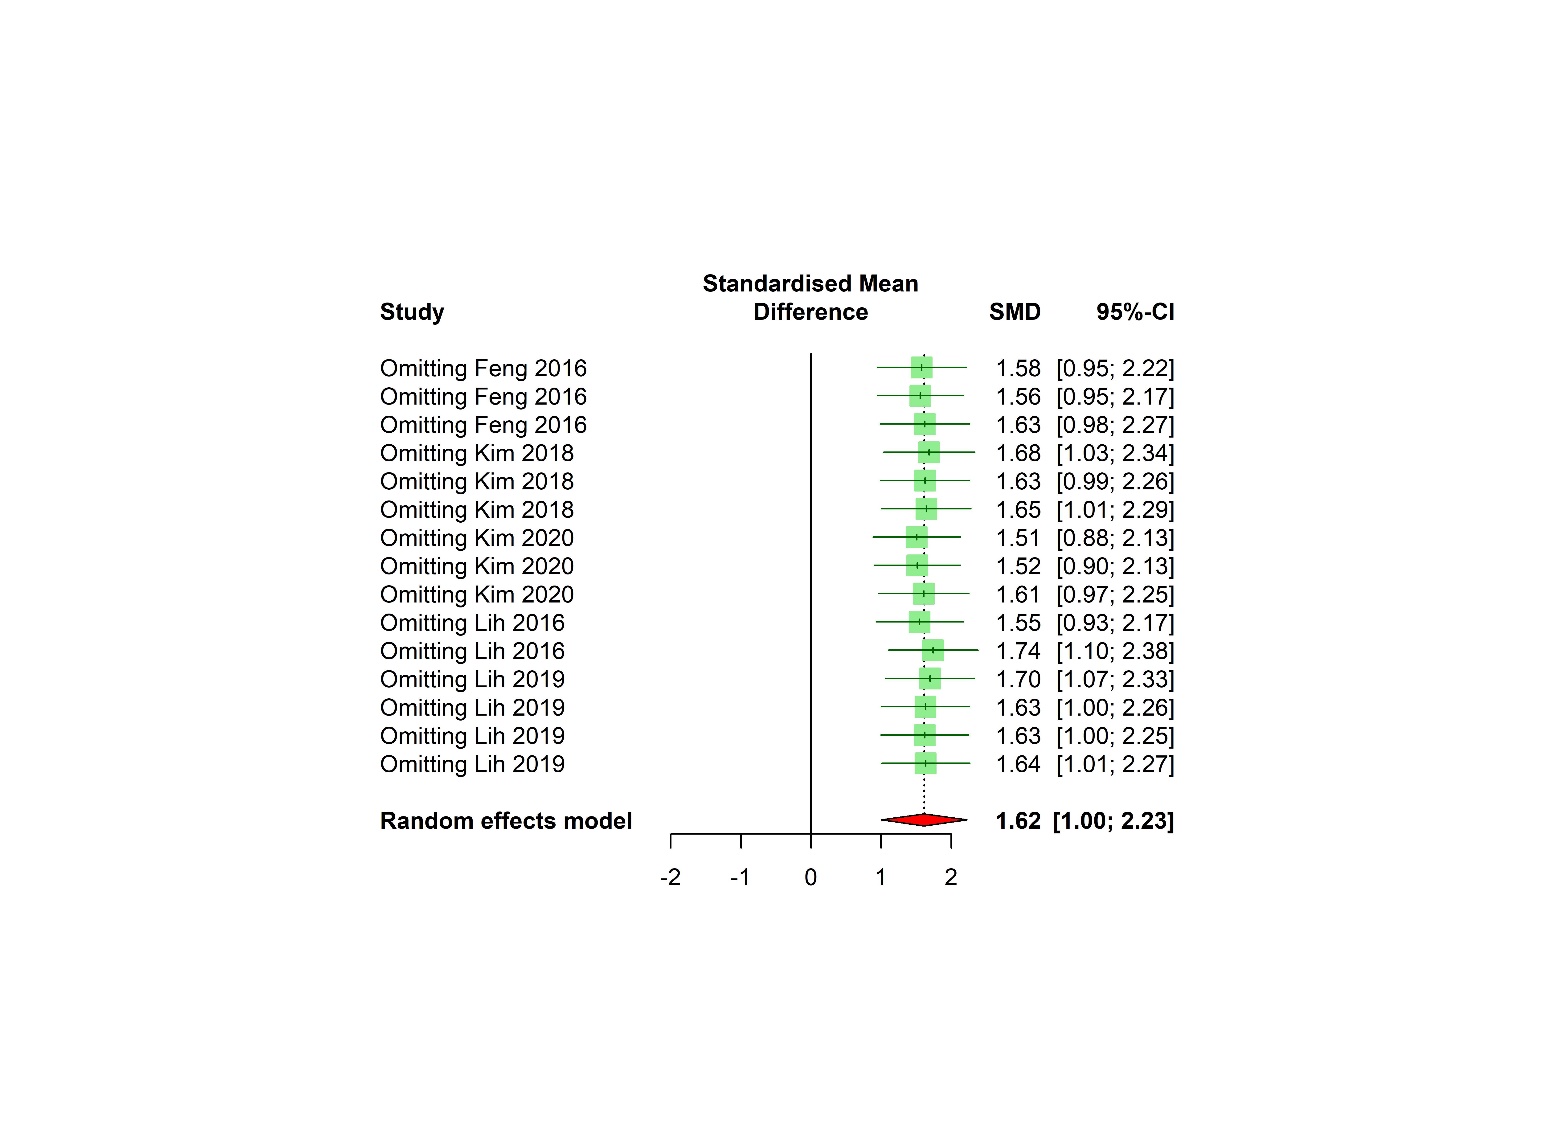
**

**α-SMA analysis**

**Forest plot:**

**
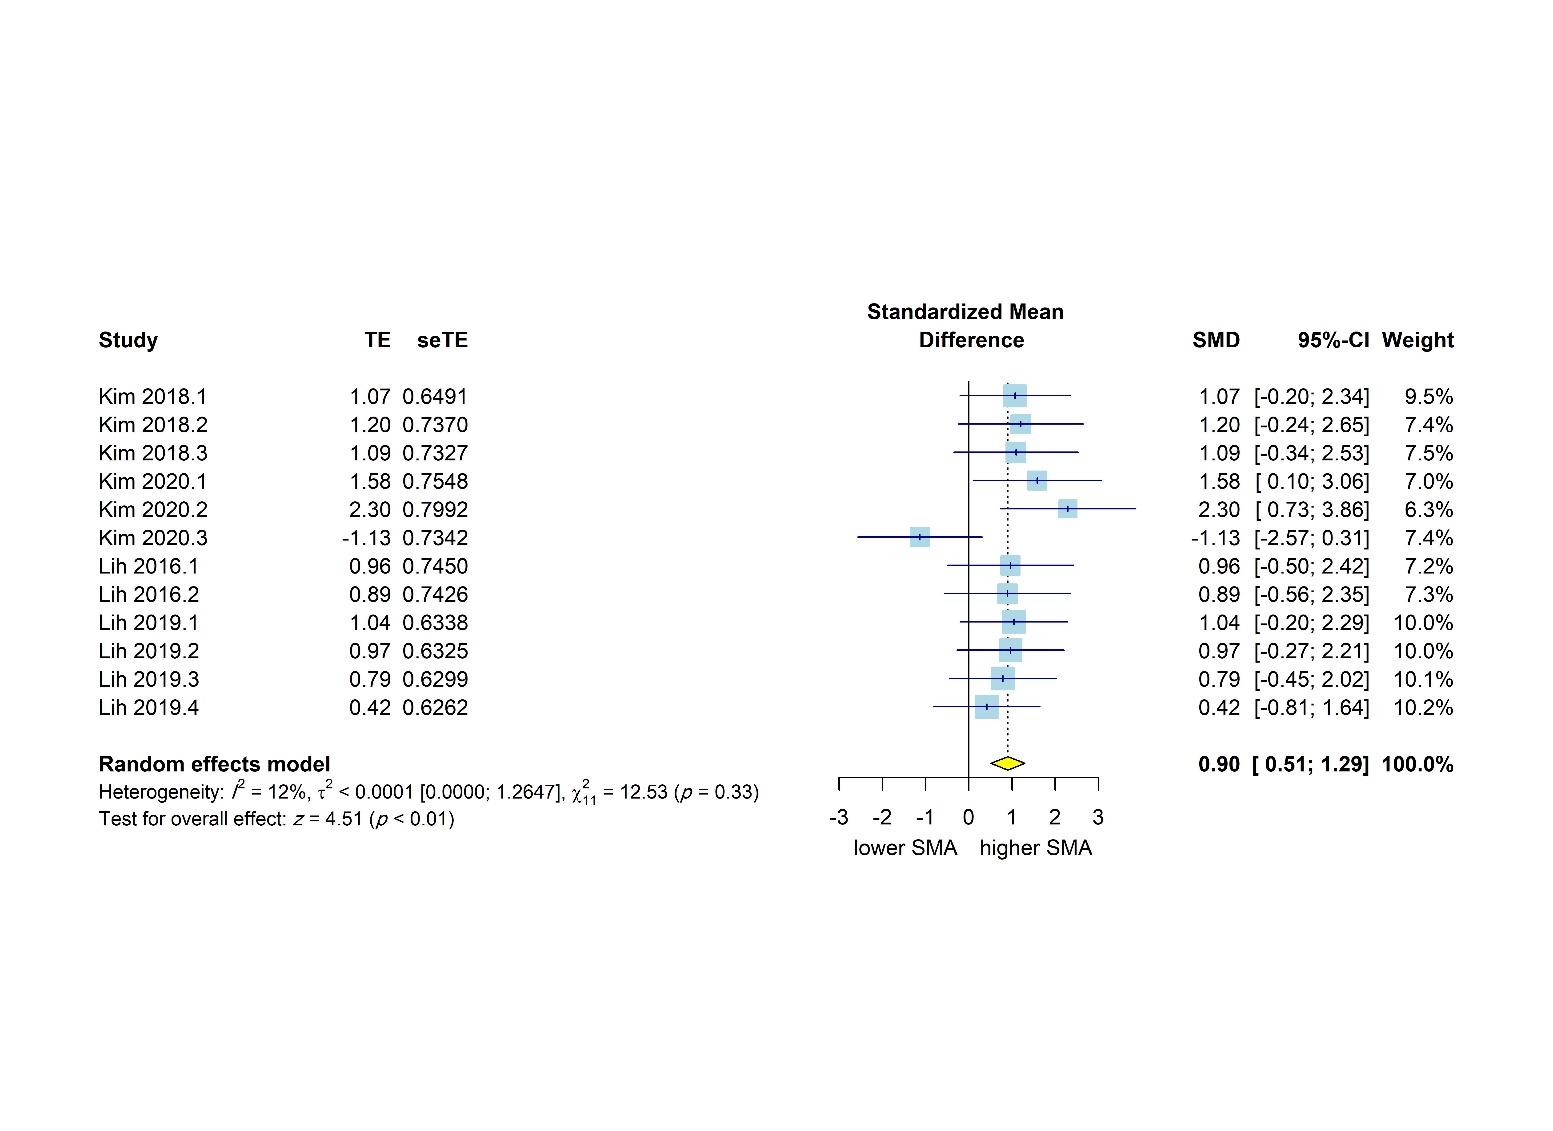
**

**Funnel plot:**

**
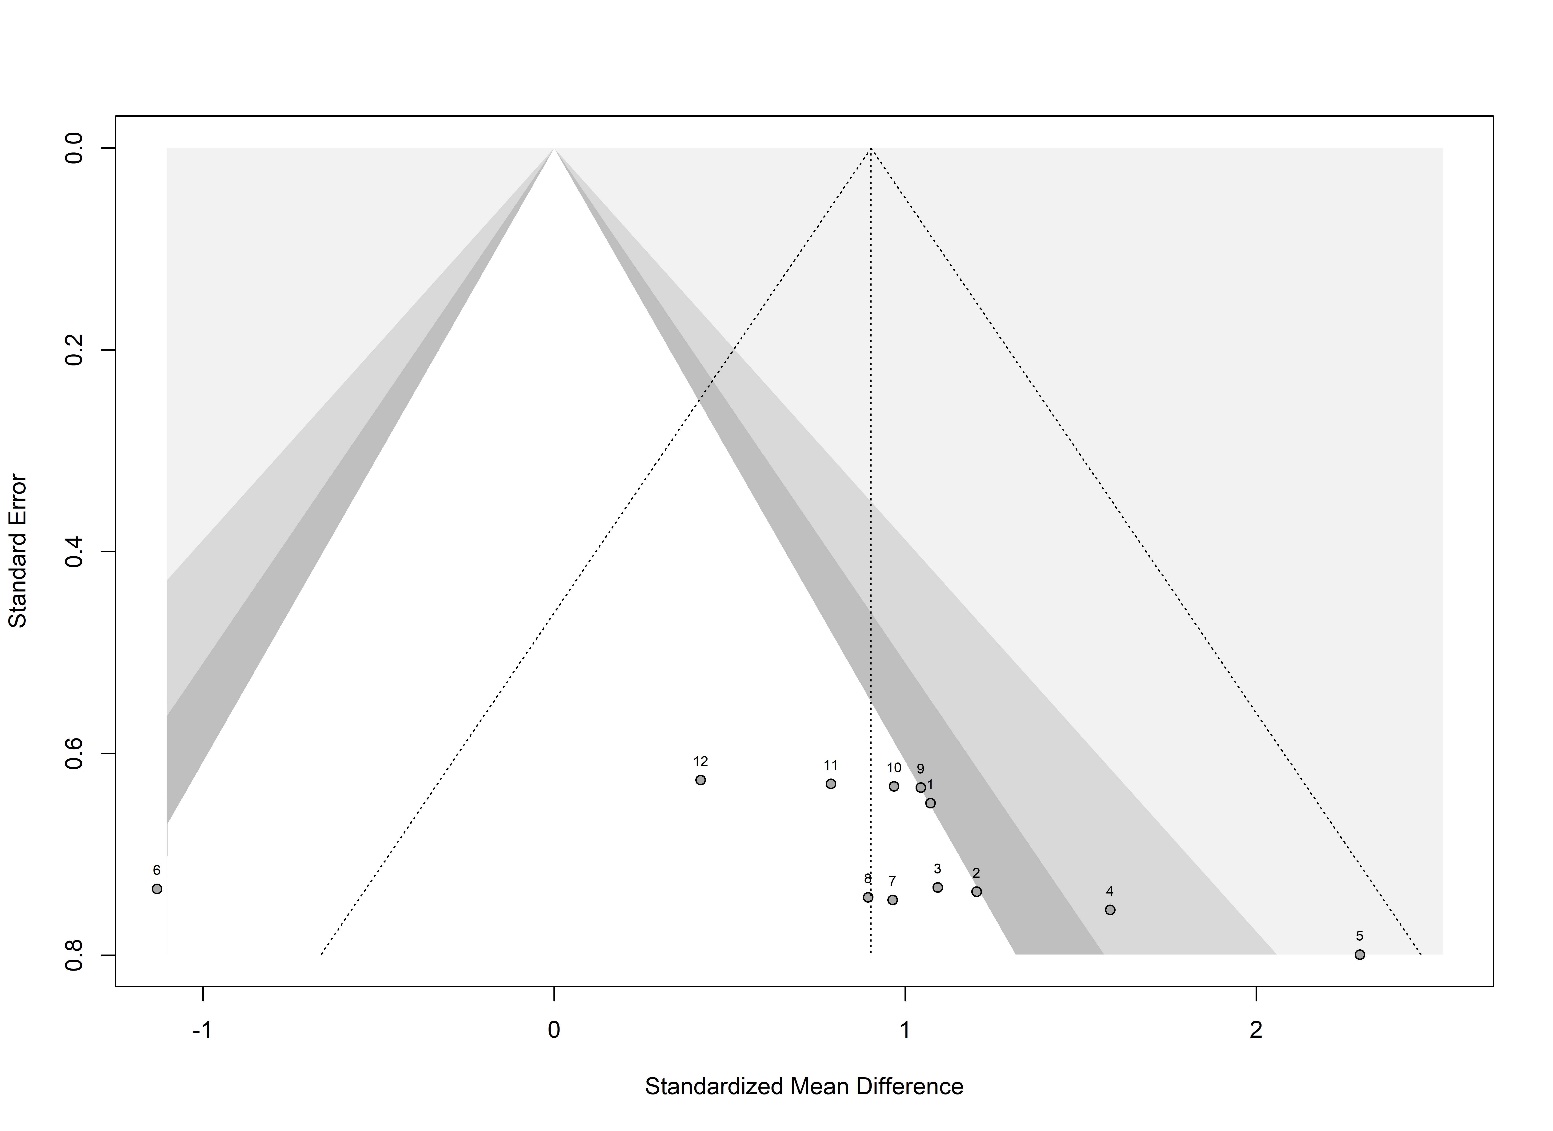
**

**Heterogeneity:**

**
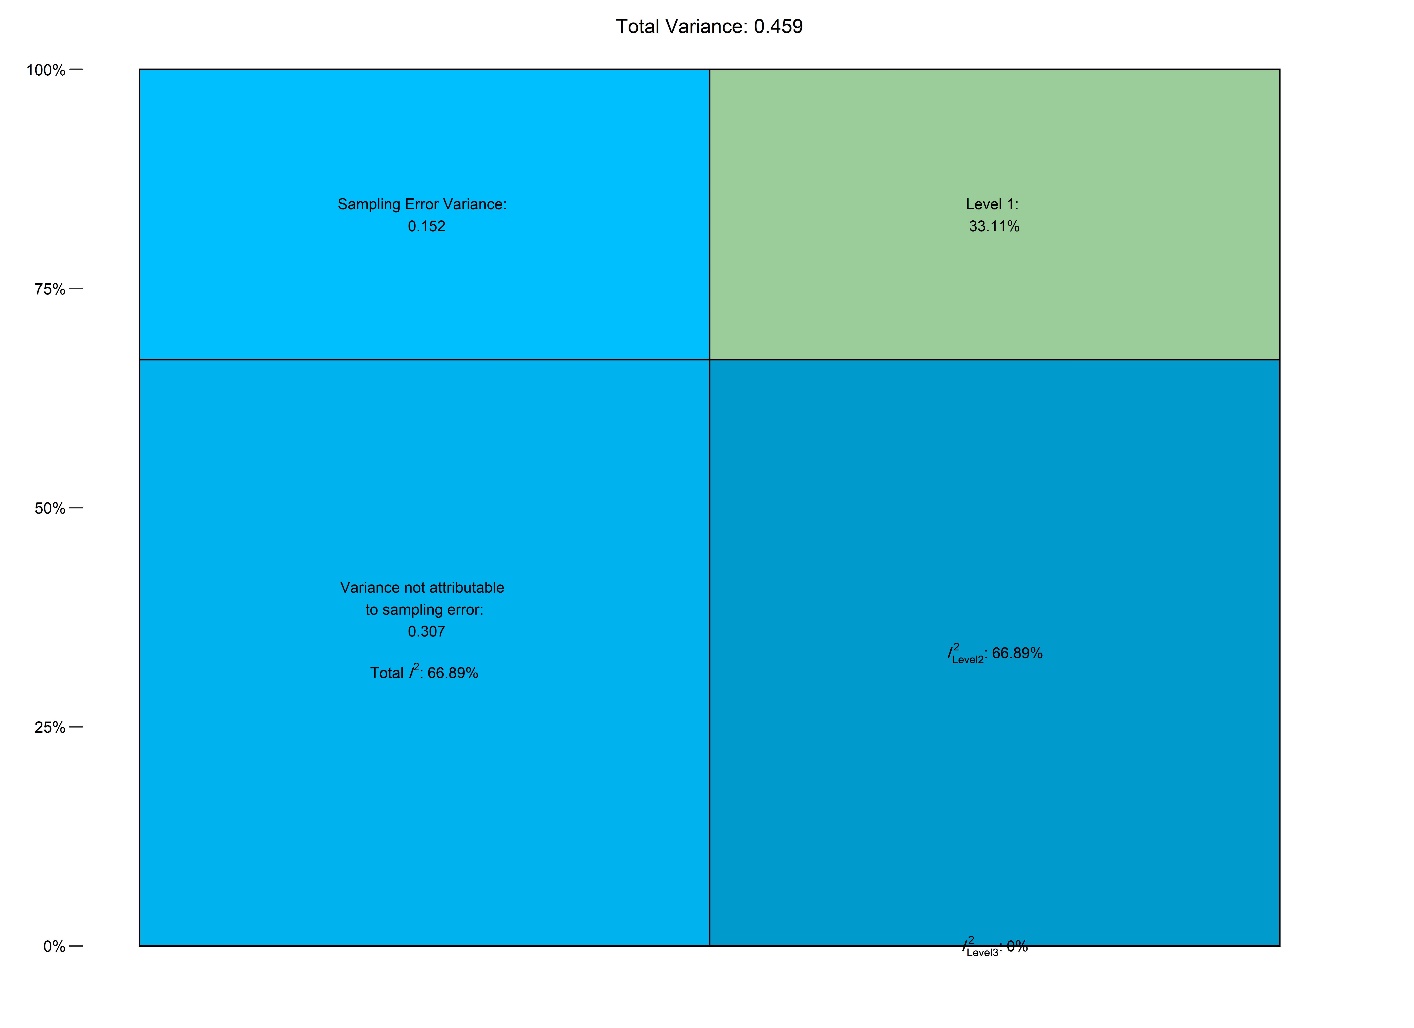
**

**Sensitivity analysis:**

**
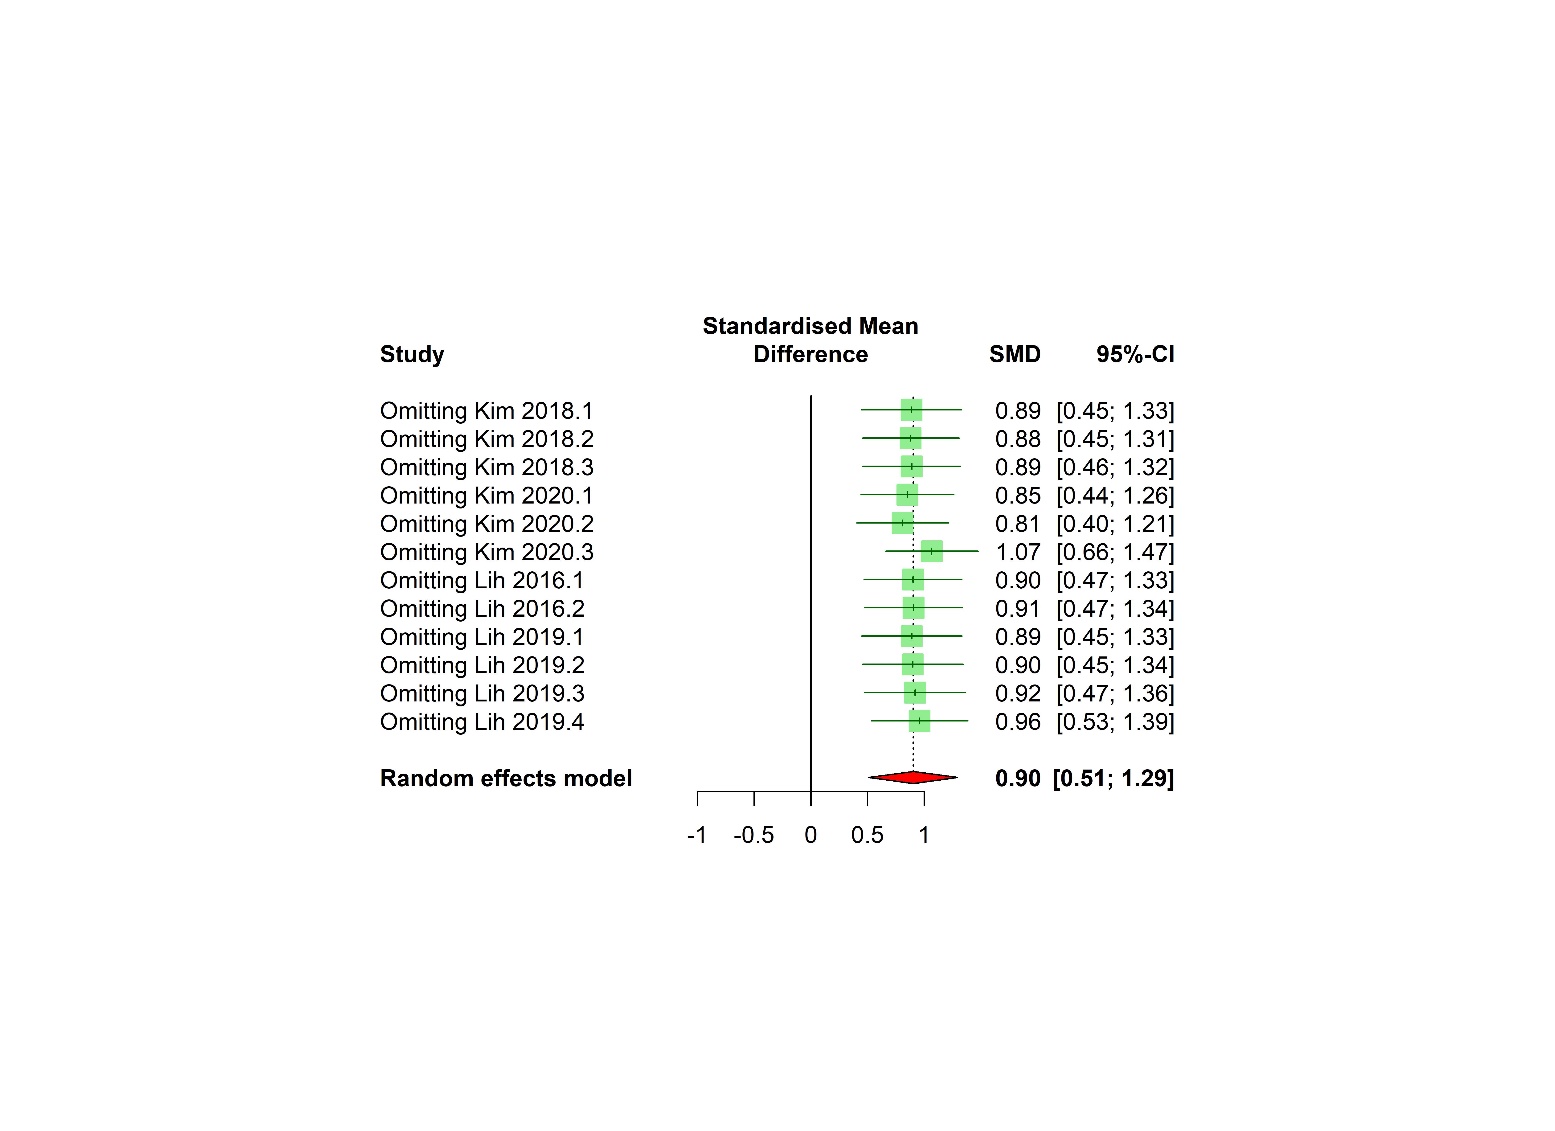
**

**Vimentin analysis**

**Forest plot:**

**
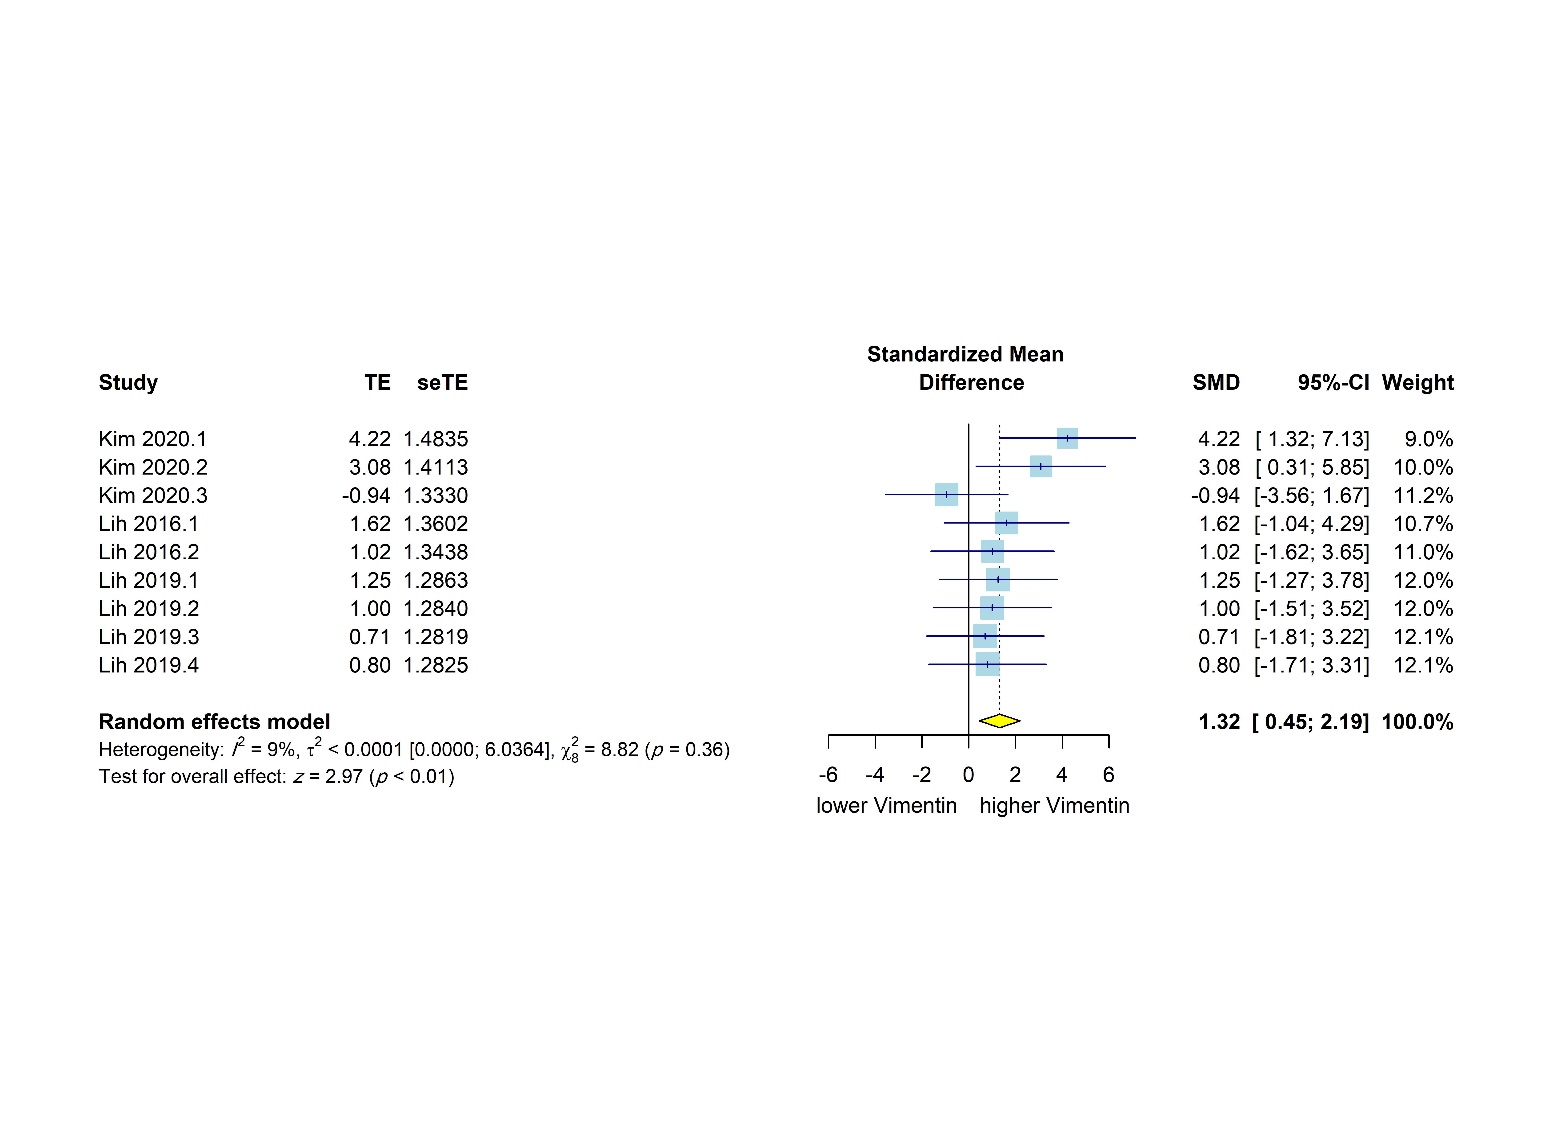
**

**Funnel plot:**

**
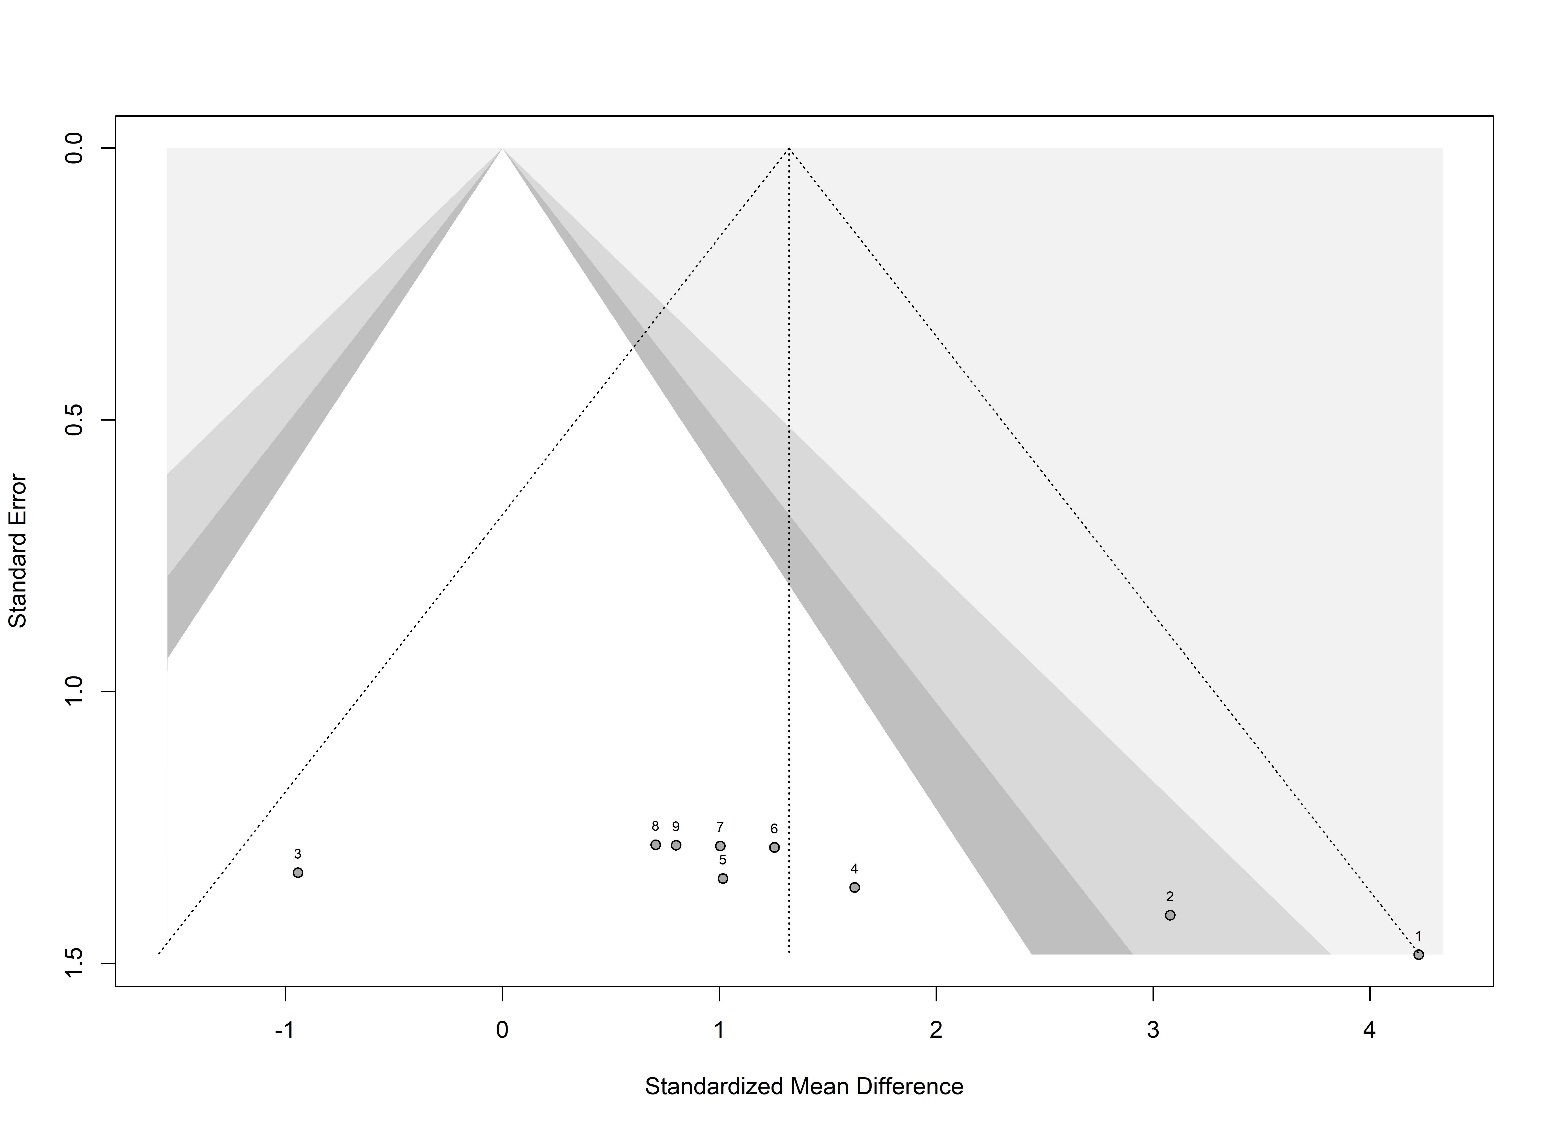
**

**Heterogeneity:**

**
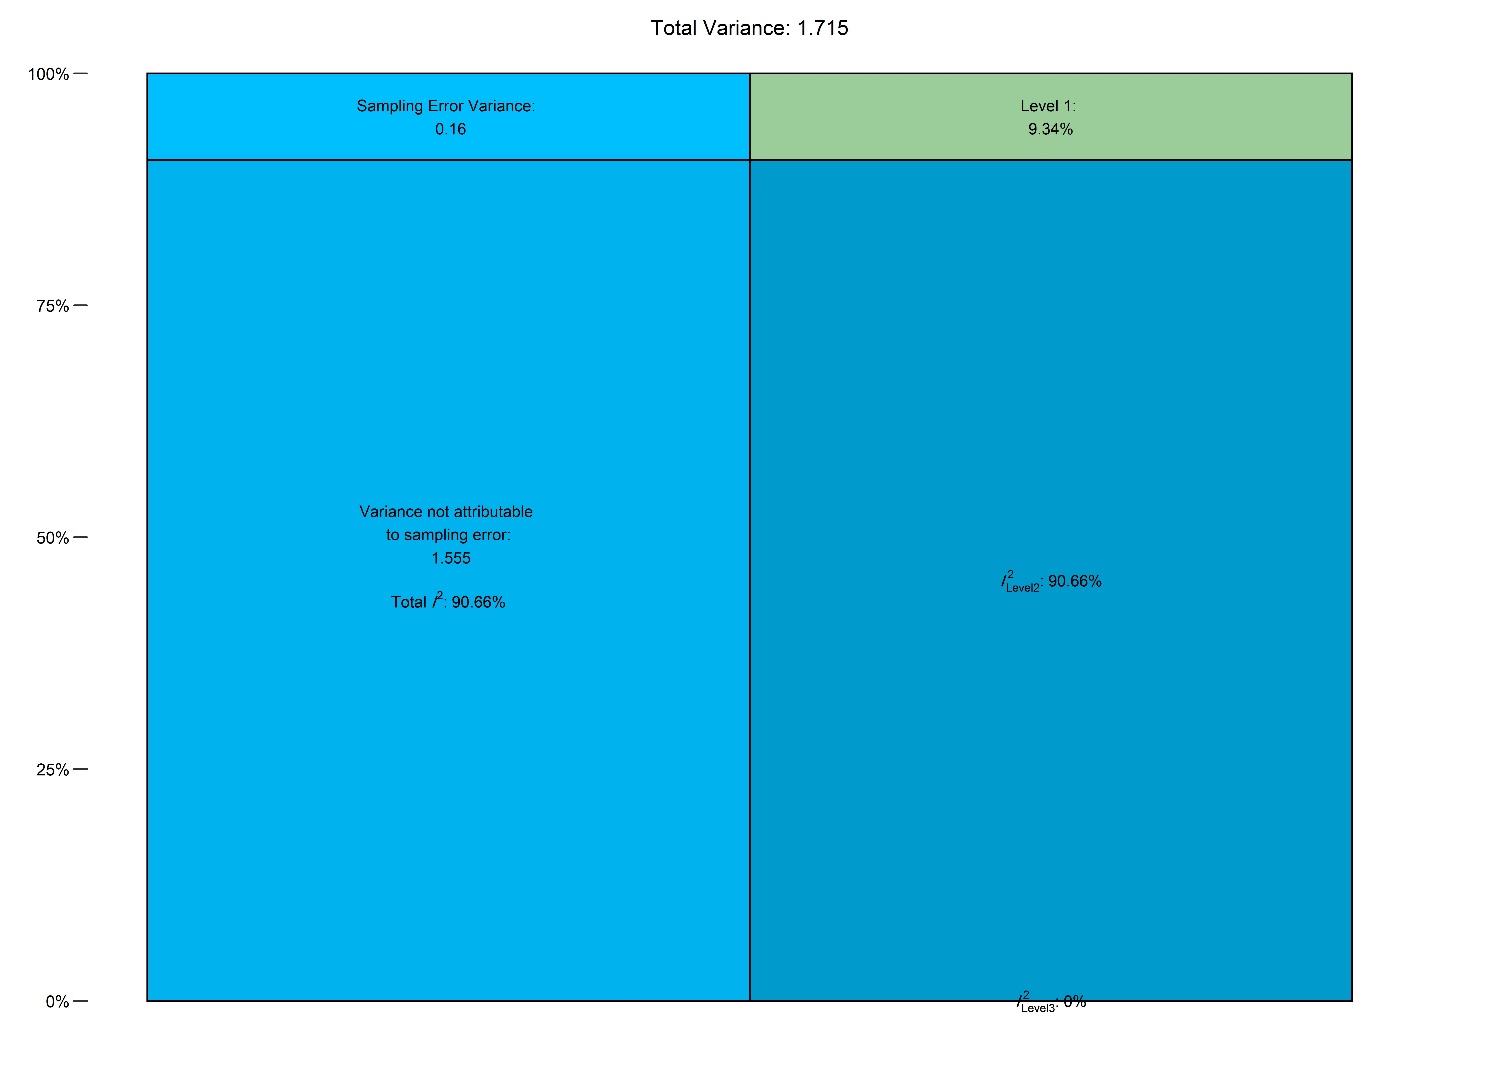
**

**Sensitivity analysis:**

**
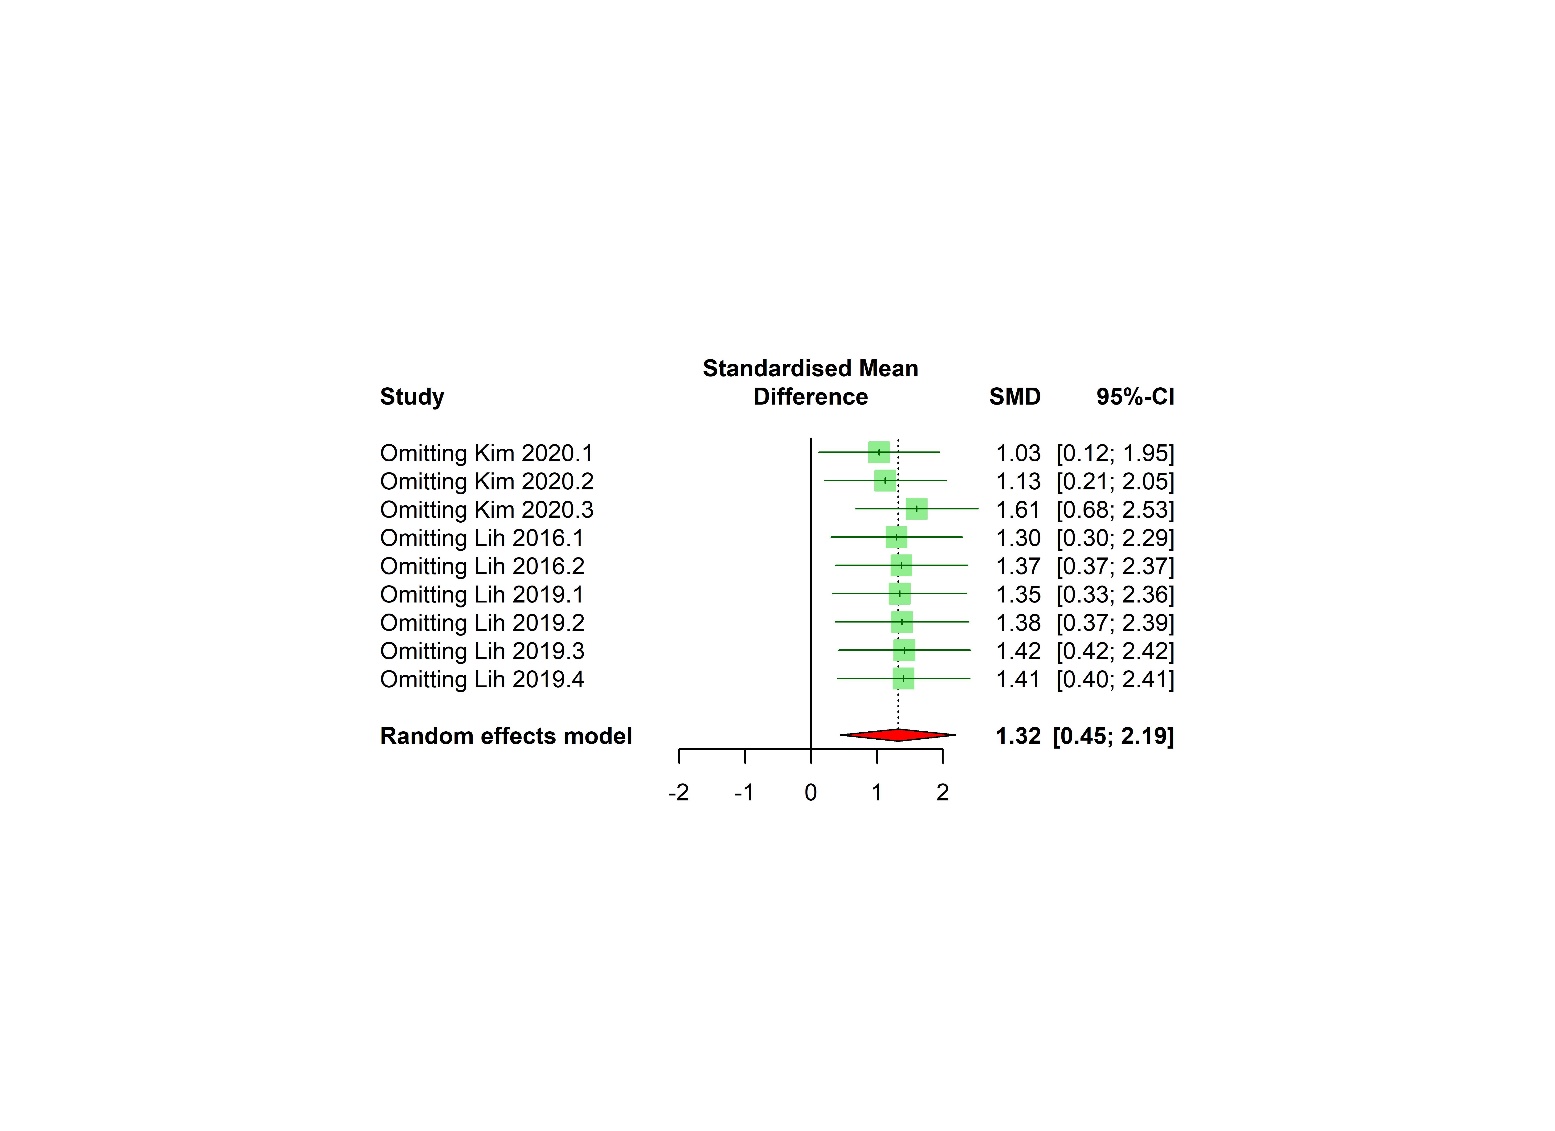
**

**IL-1 analysis**

**Forest plot:**

**
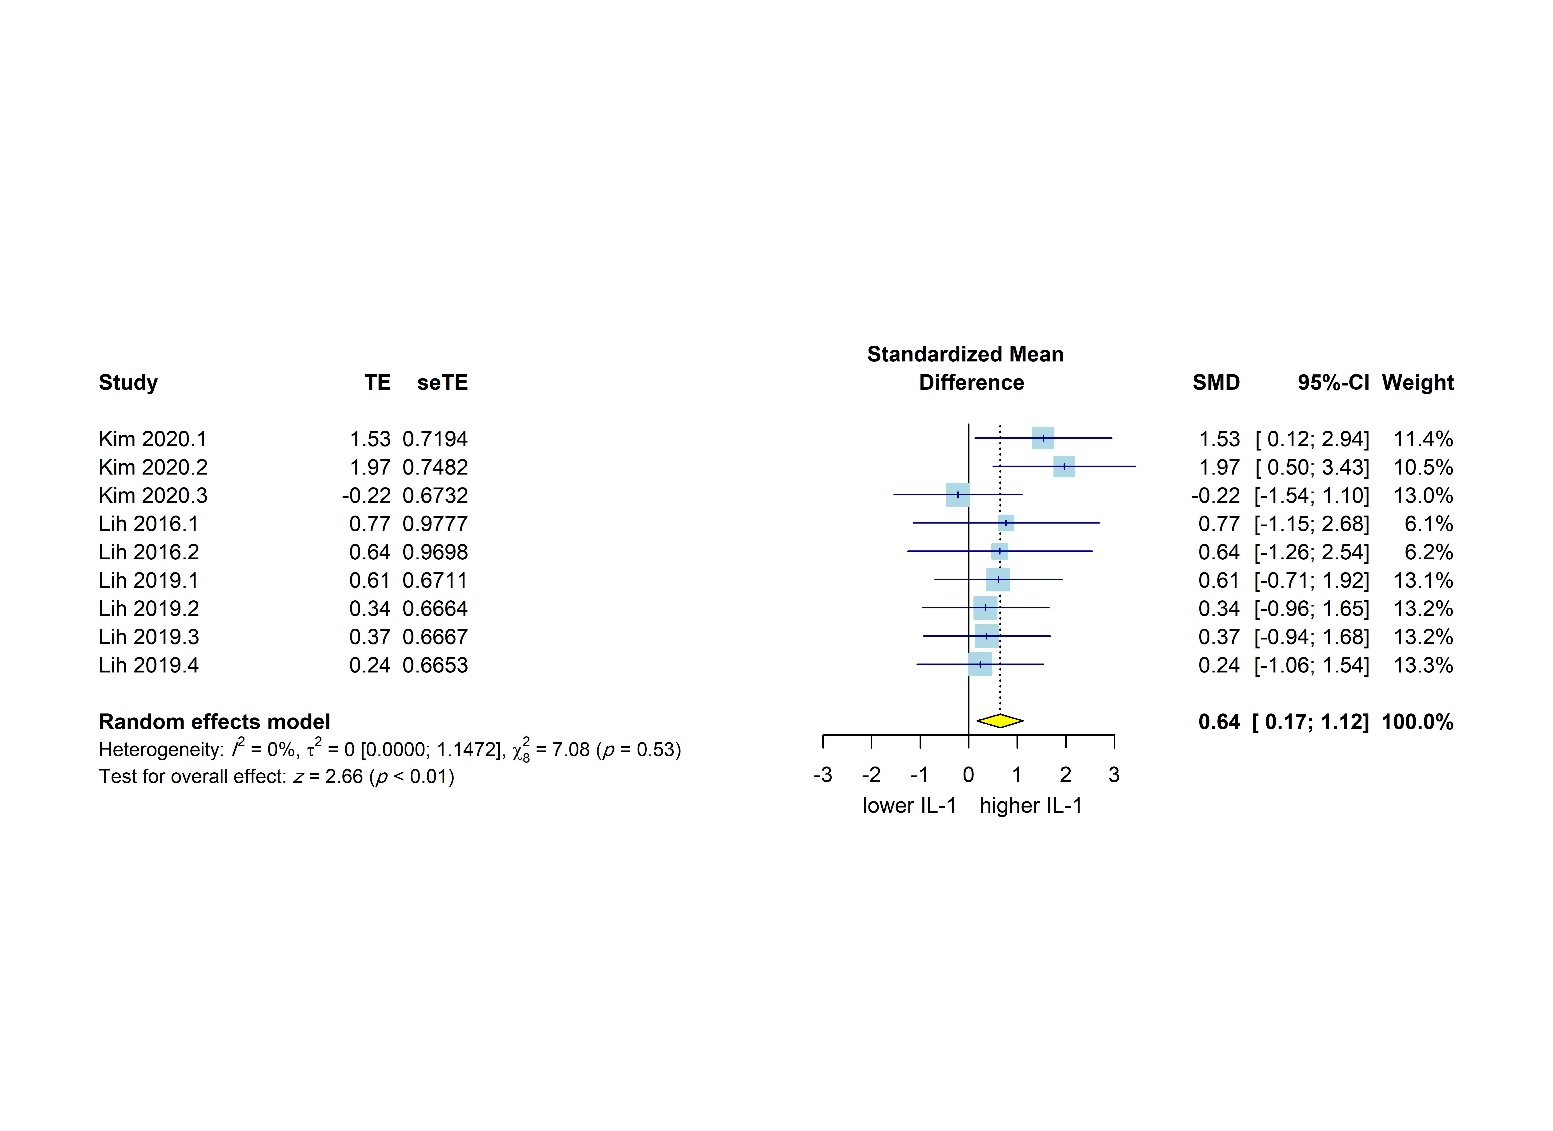
**

**Funnel plot:**

**
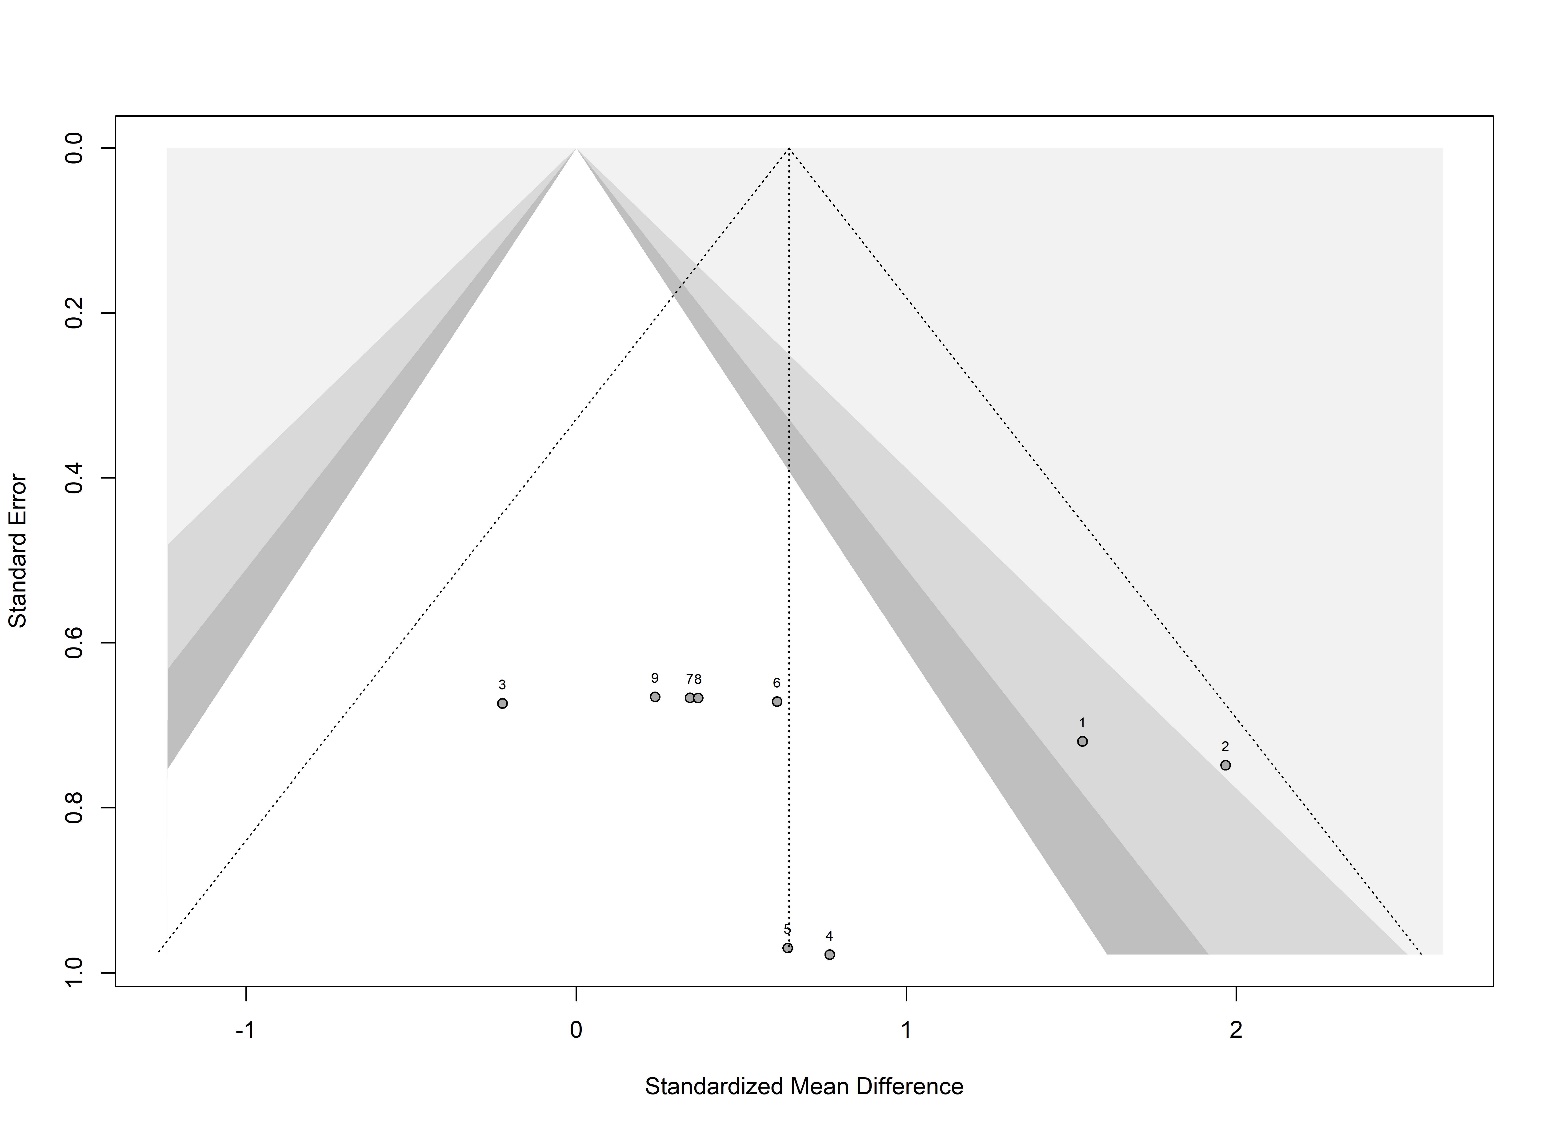
**

**Heterogeneity:**

**
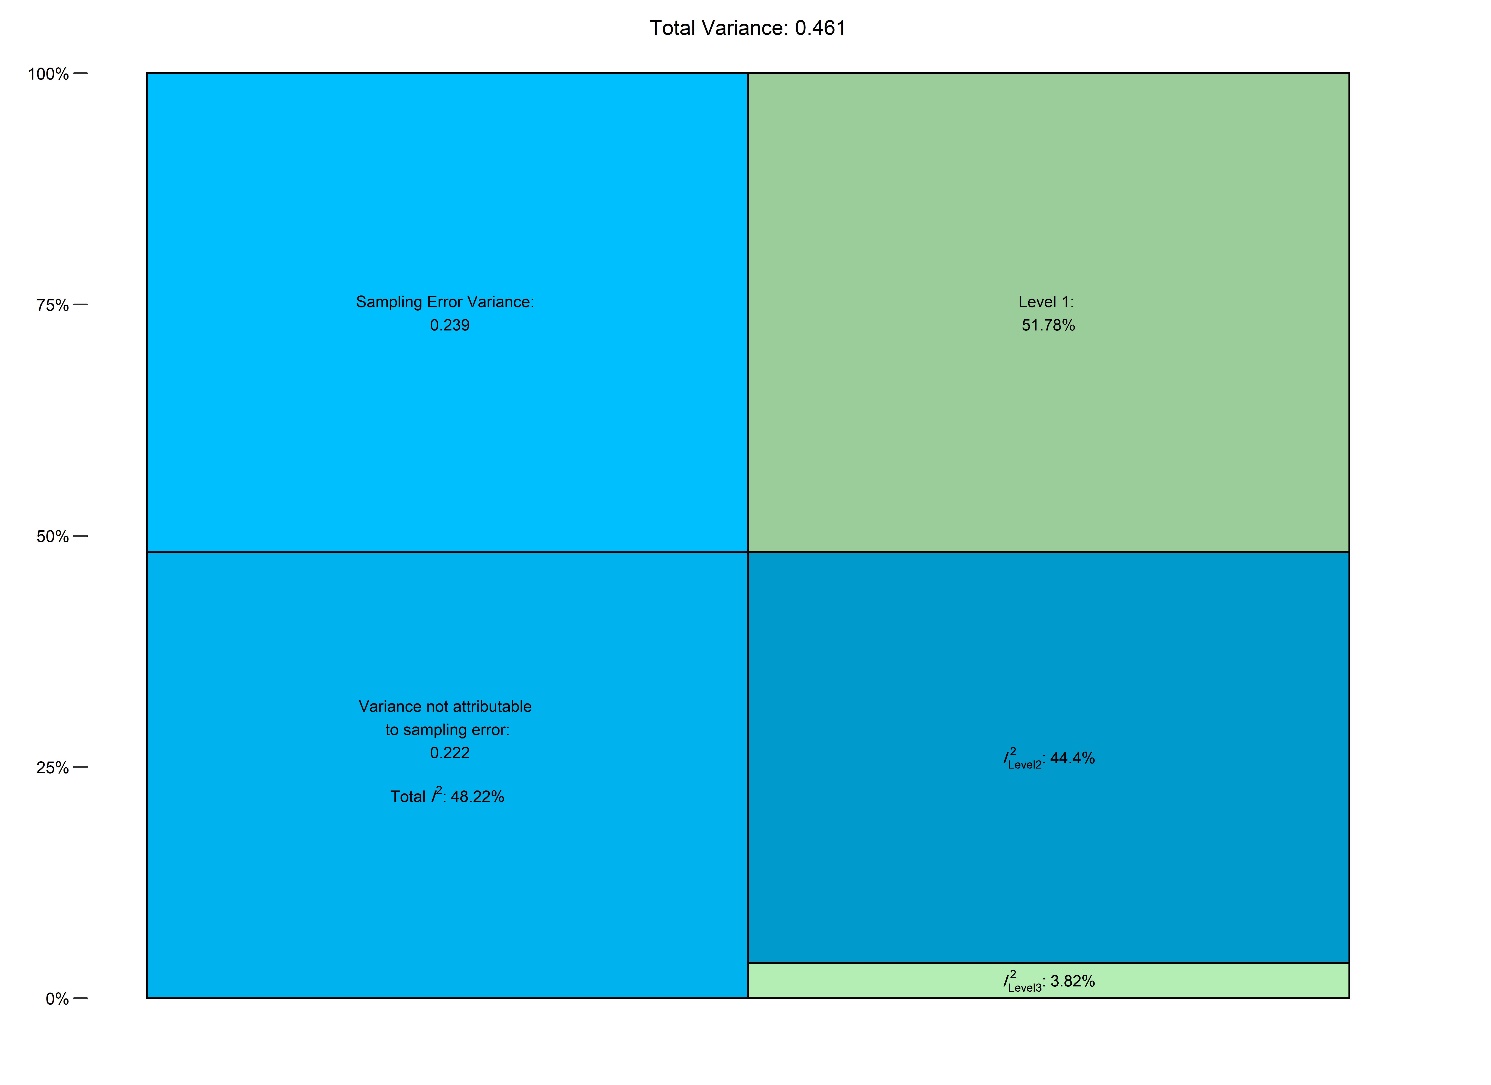
**

**Sensitivity analysis:**

**
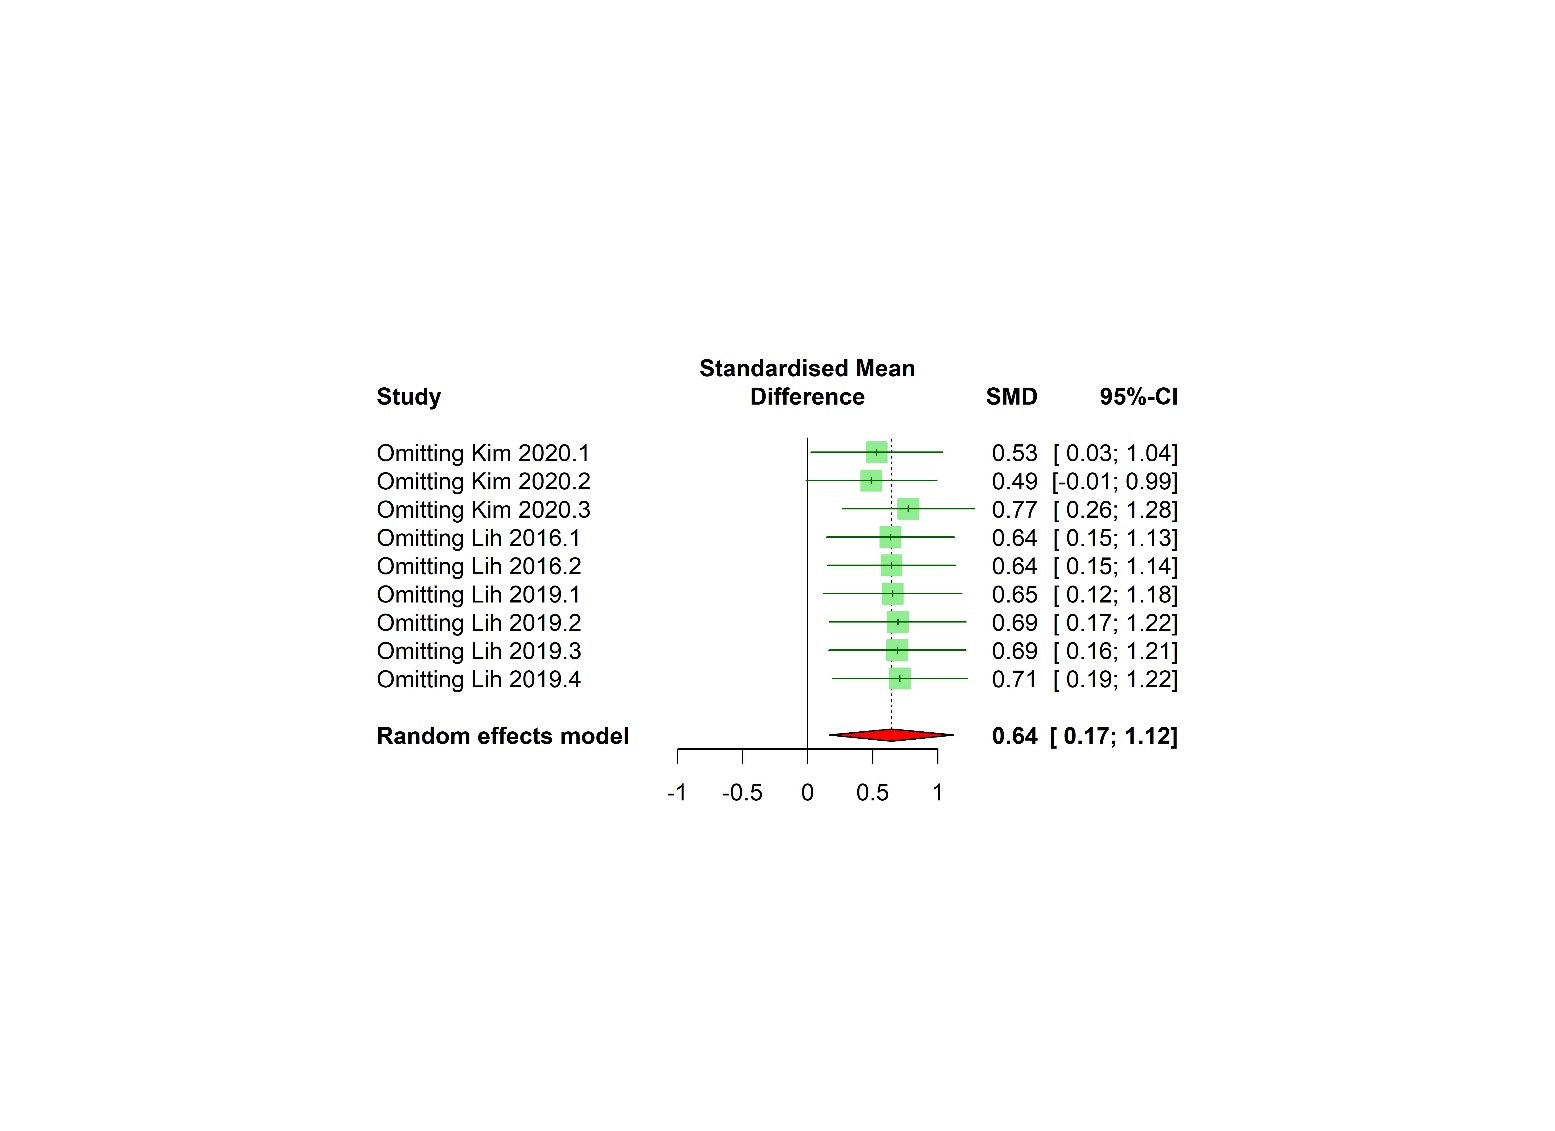
**

**IL-6 analysis**

**Forest plot:**

**
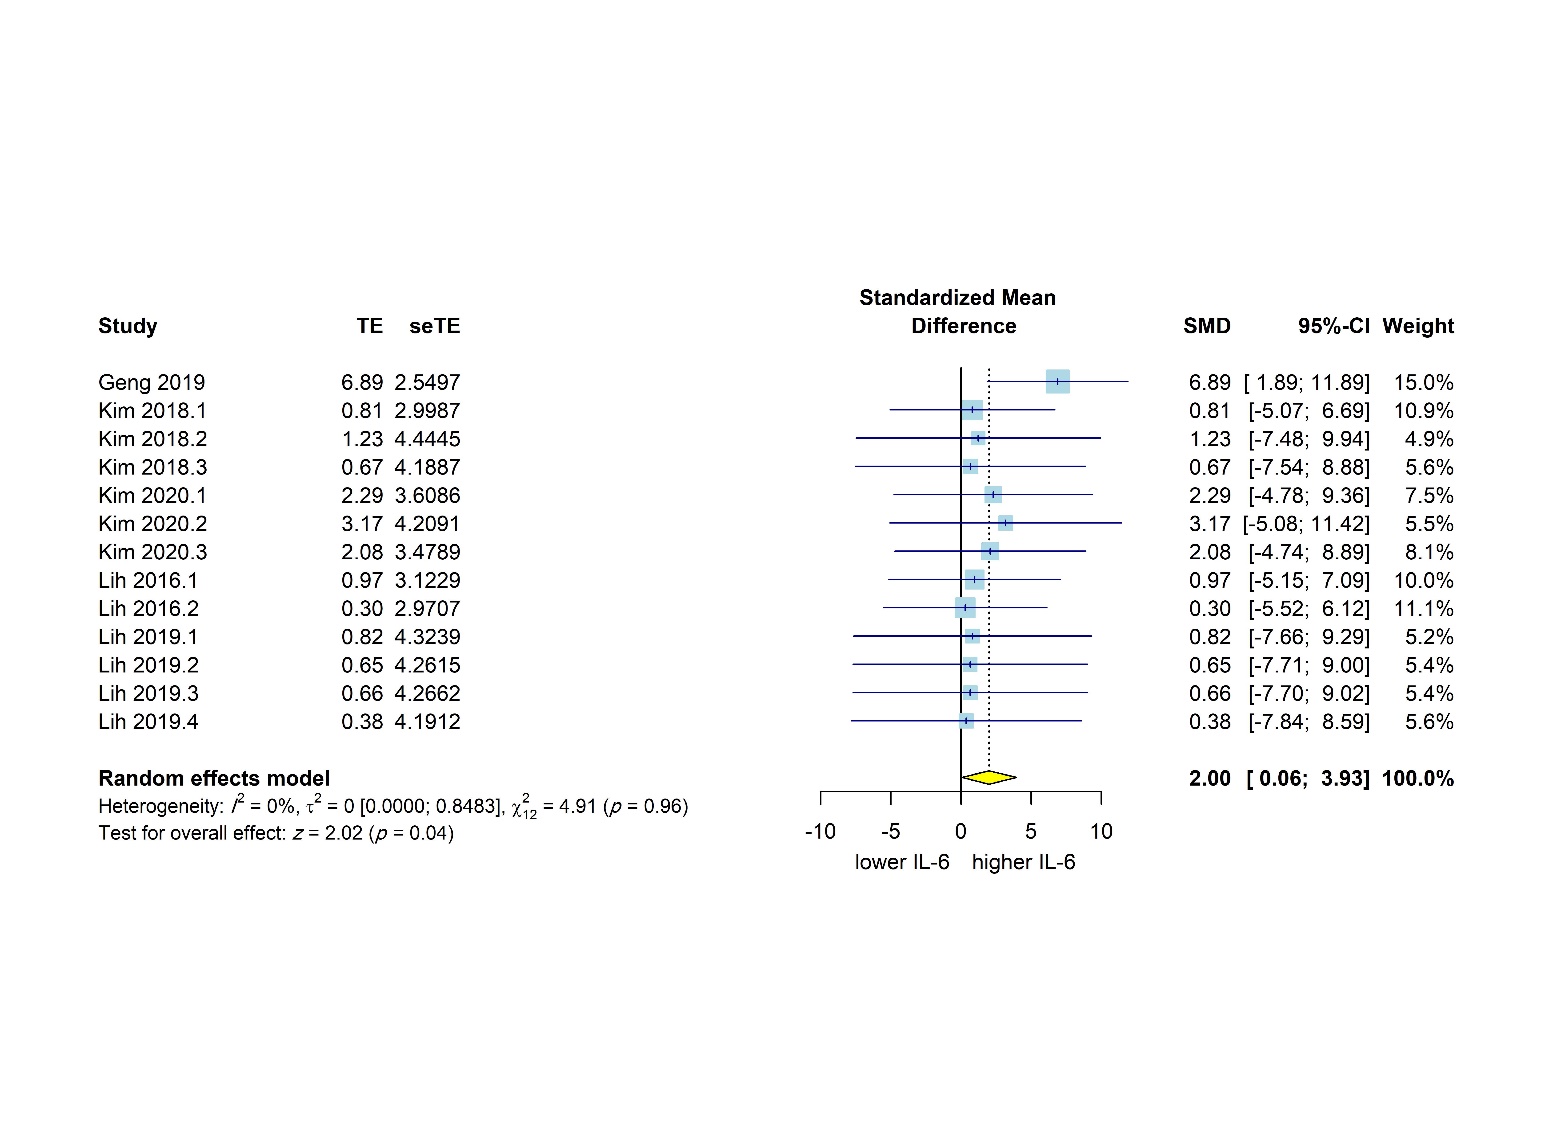
**

**Funnel plot:**

**
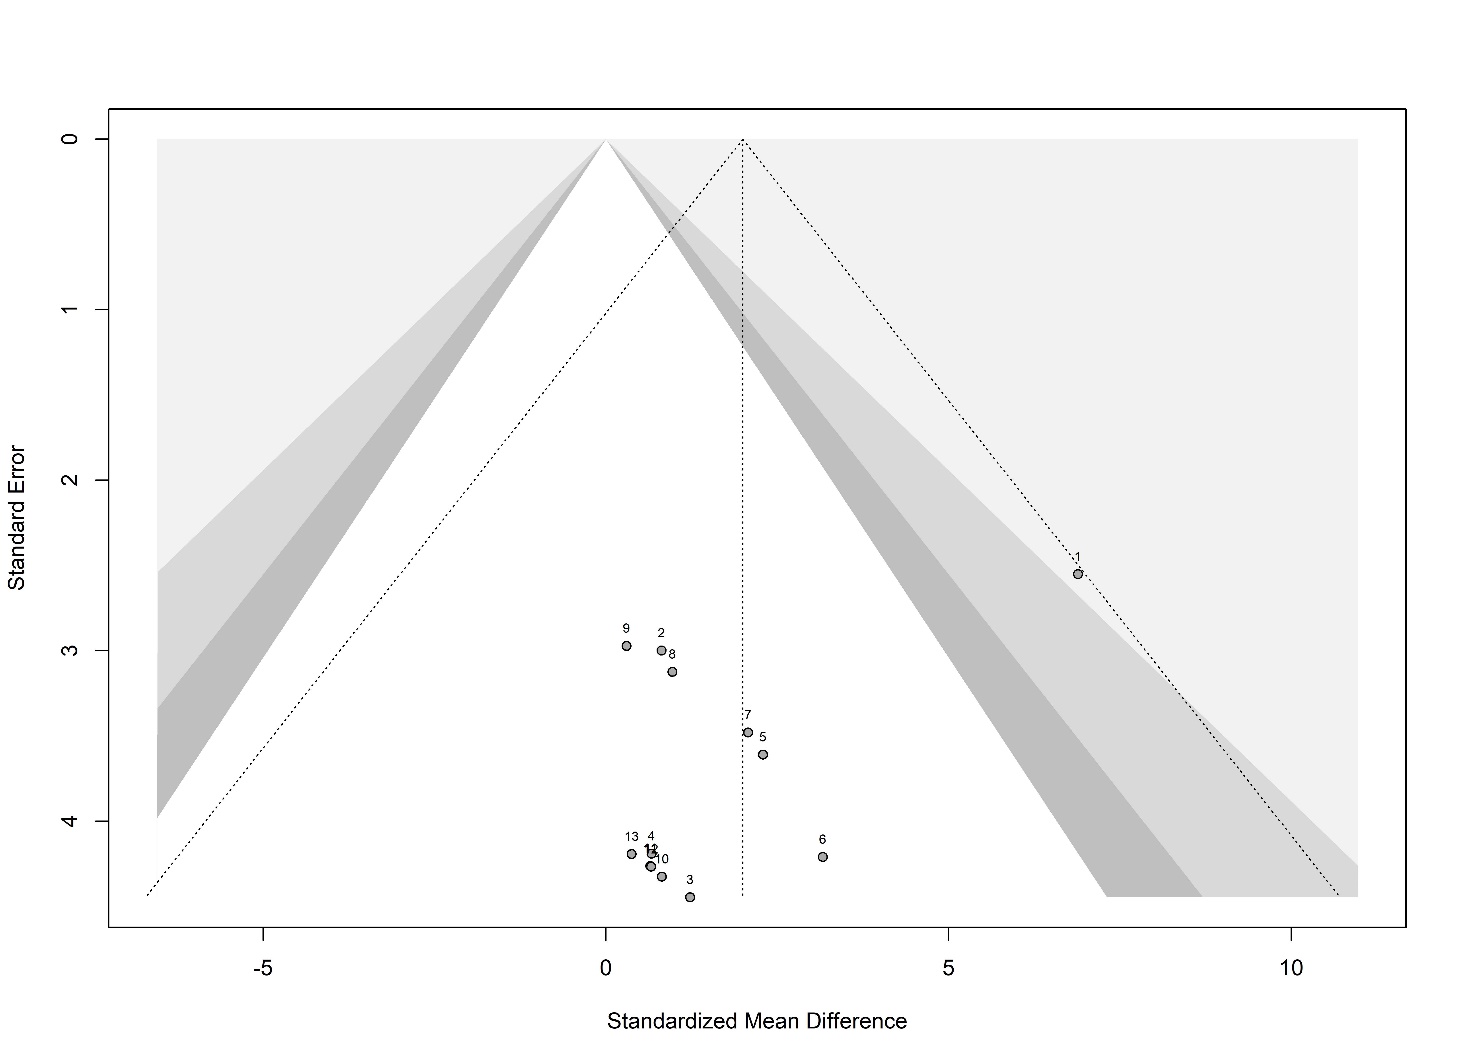
**

**Heterogeneity:**

**
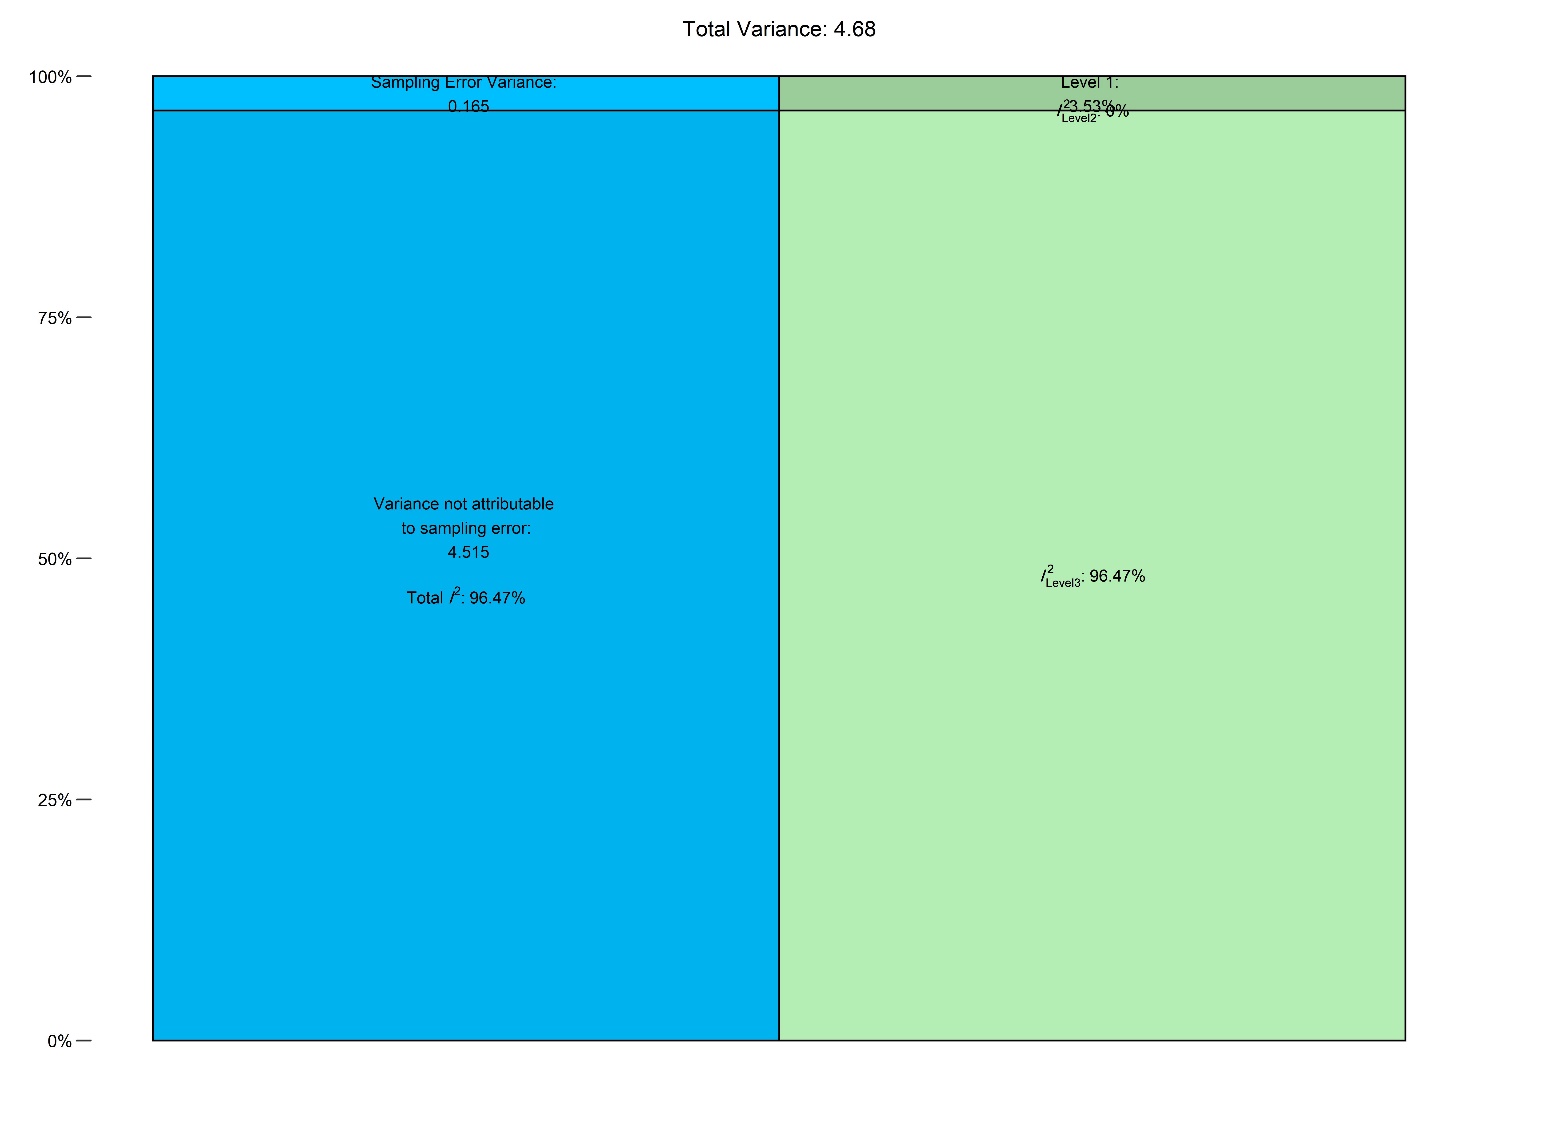
**

**Sensitivity analysis:**

**
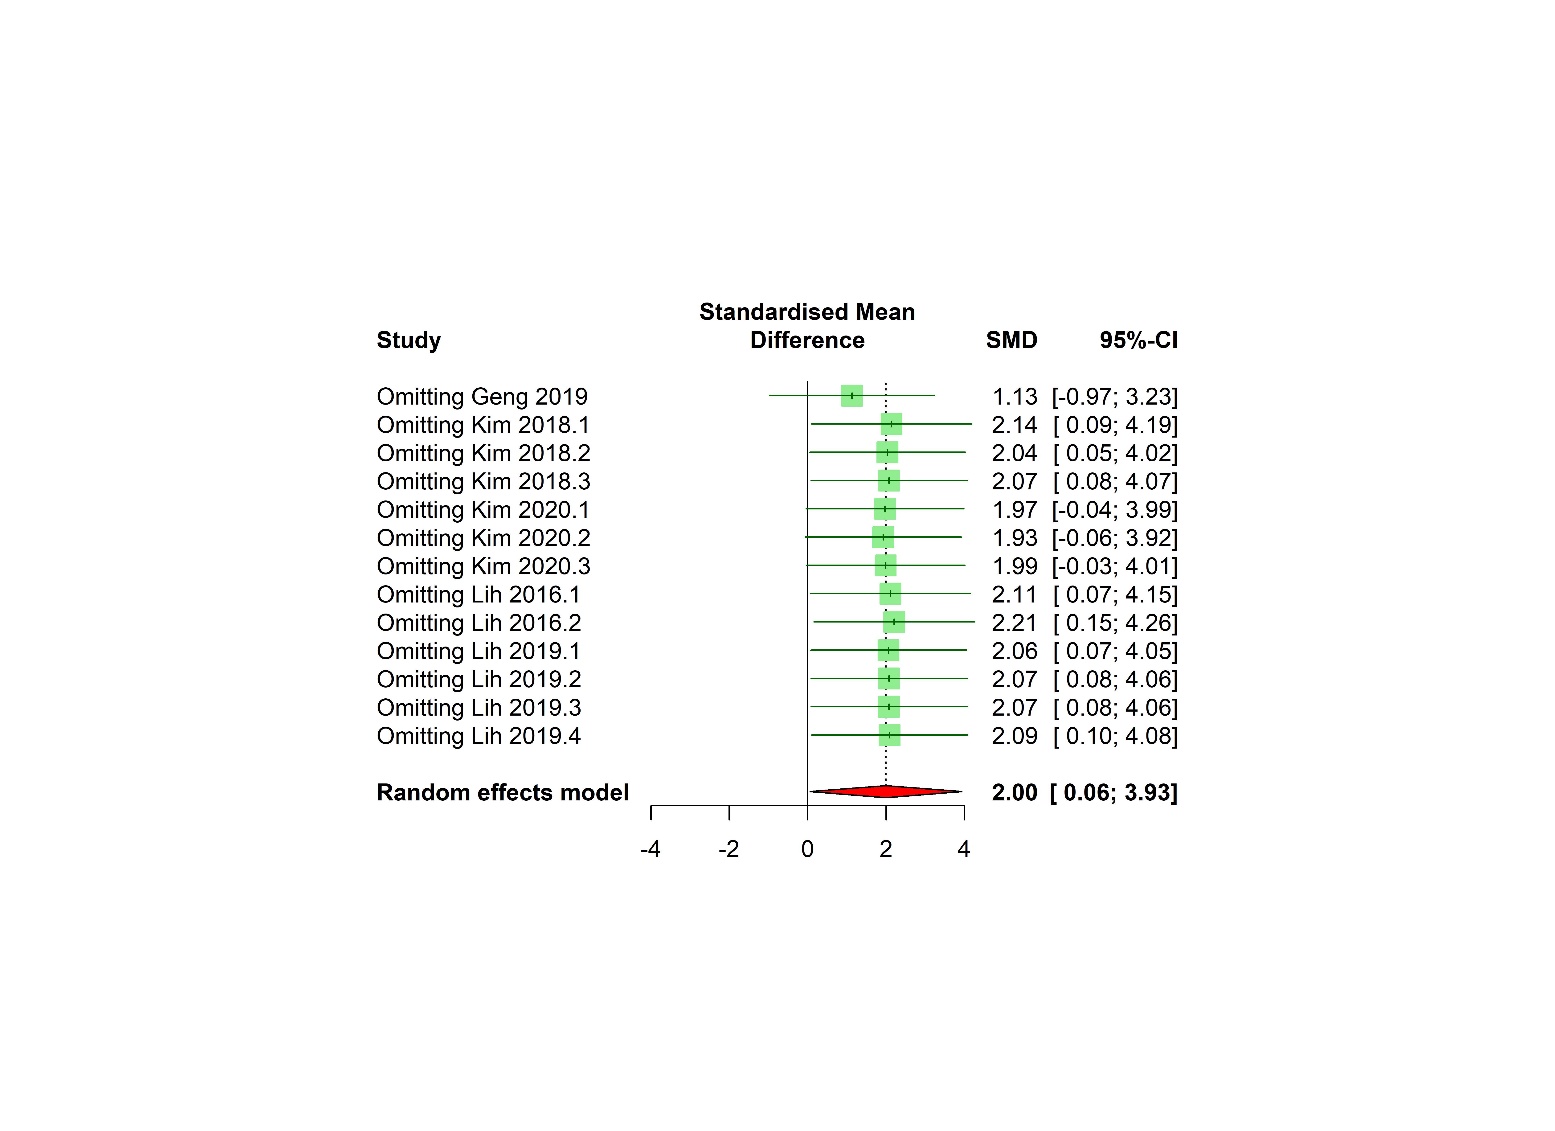
**

**TNF-α analysis**

**Forest plot:**

**
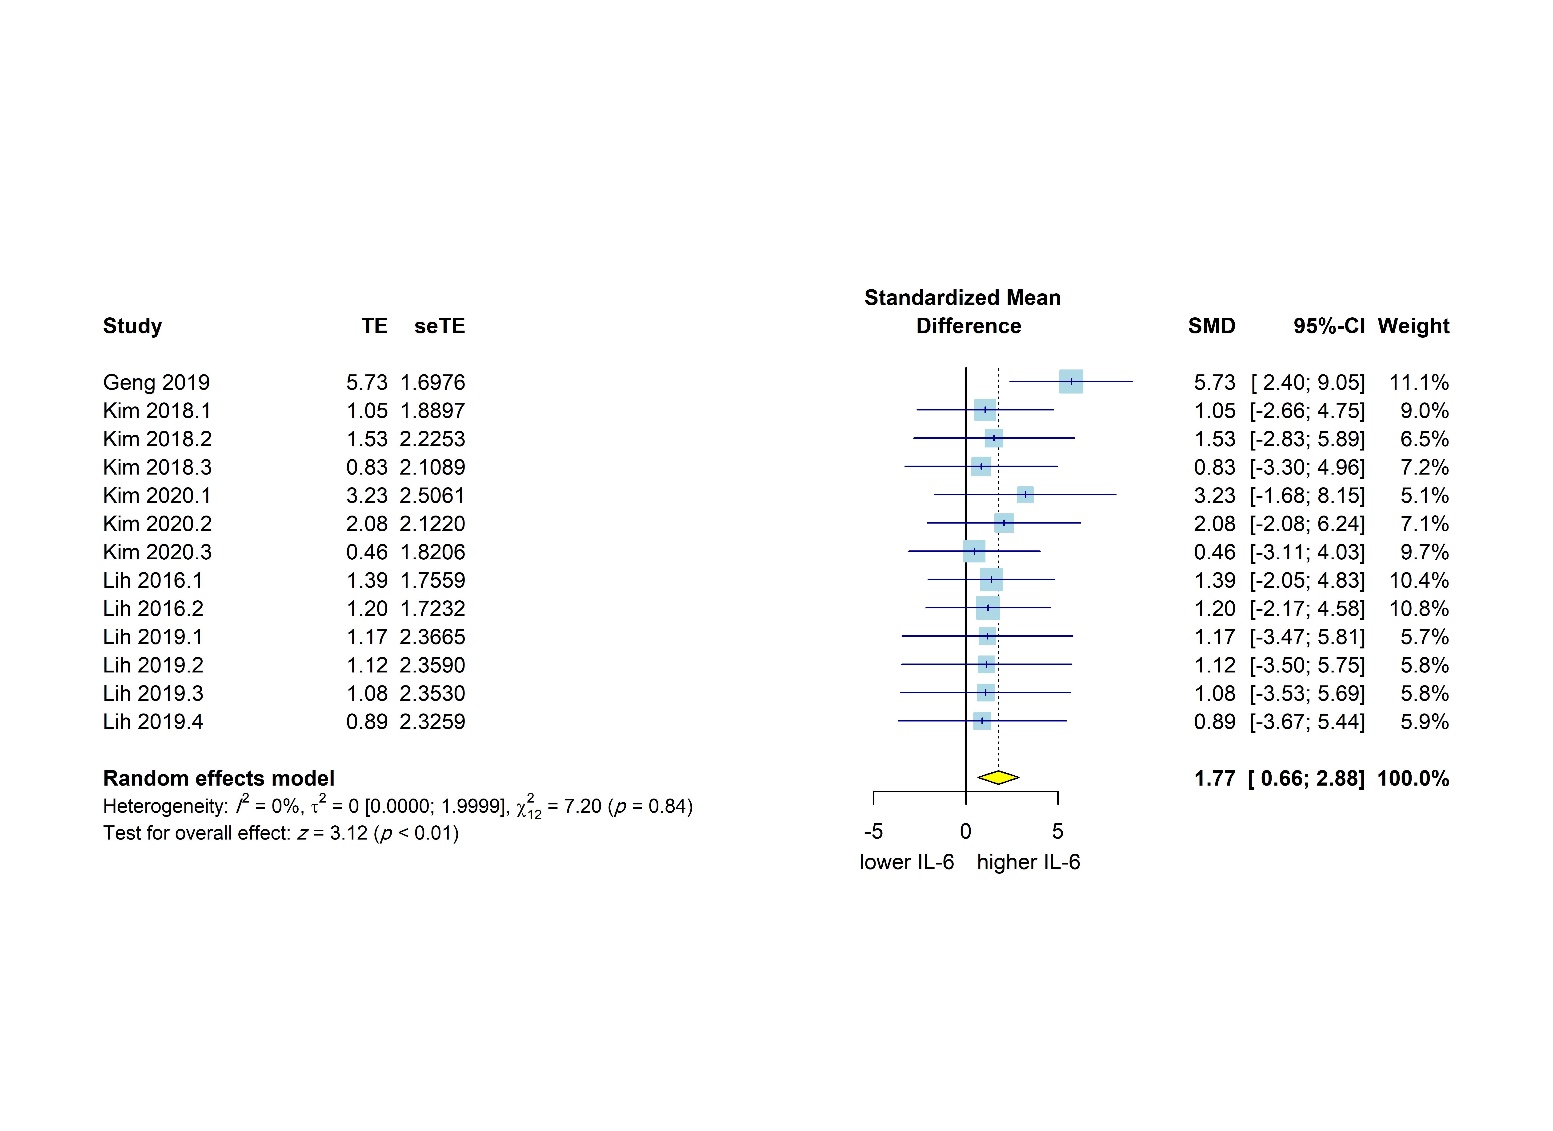
**

**Funnel plot:**

**
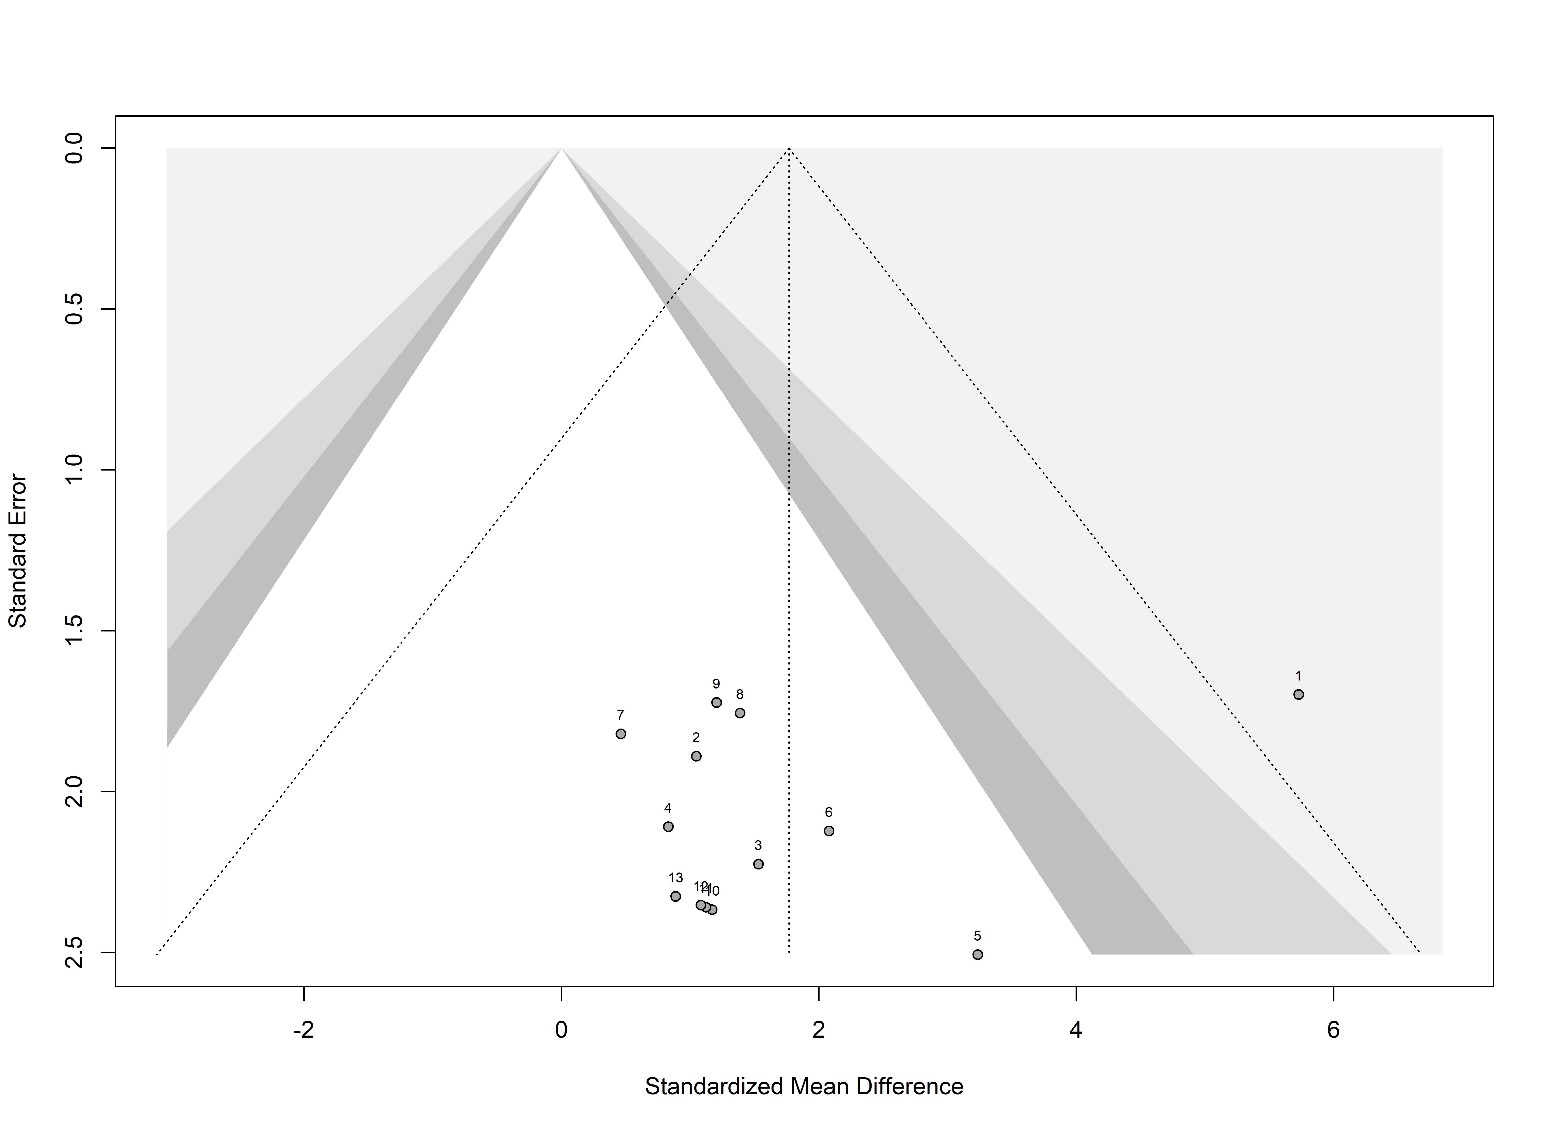
**

**Heterogeneity:**

**
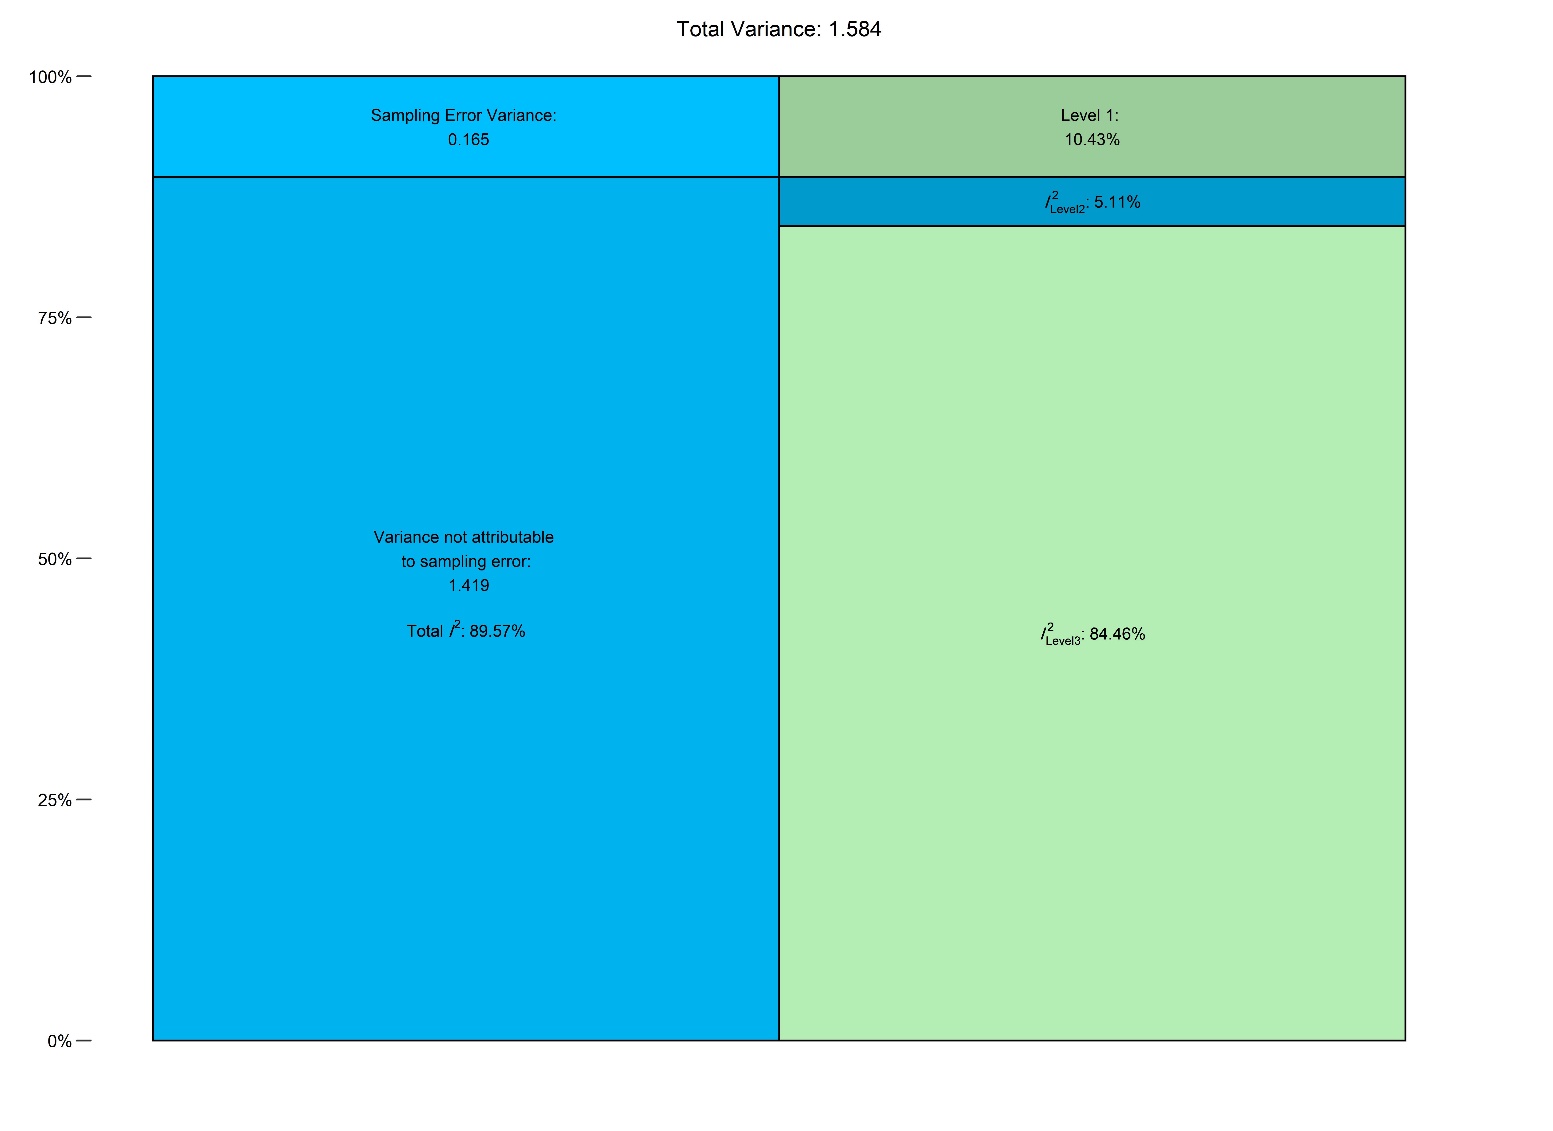
**

**Sensitivity analysis:**

**
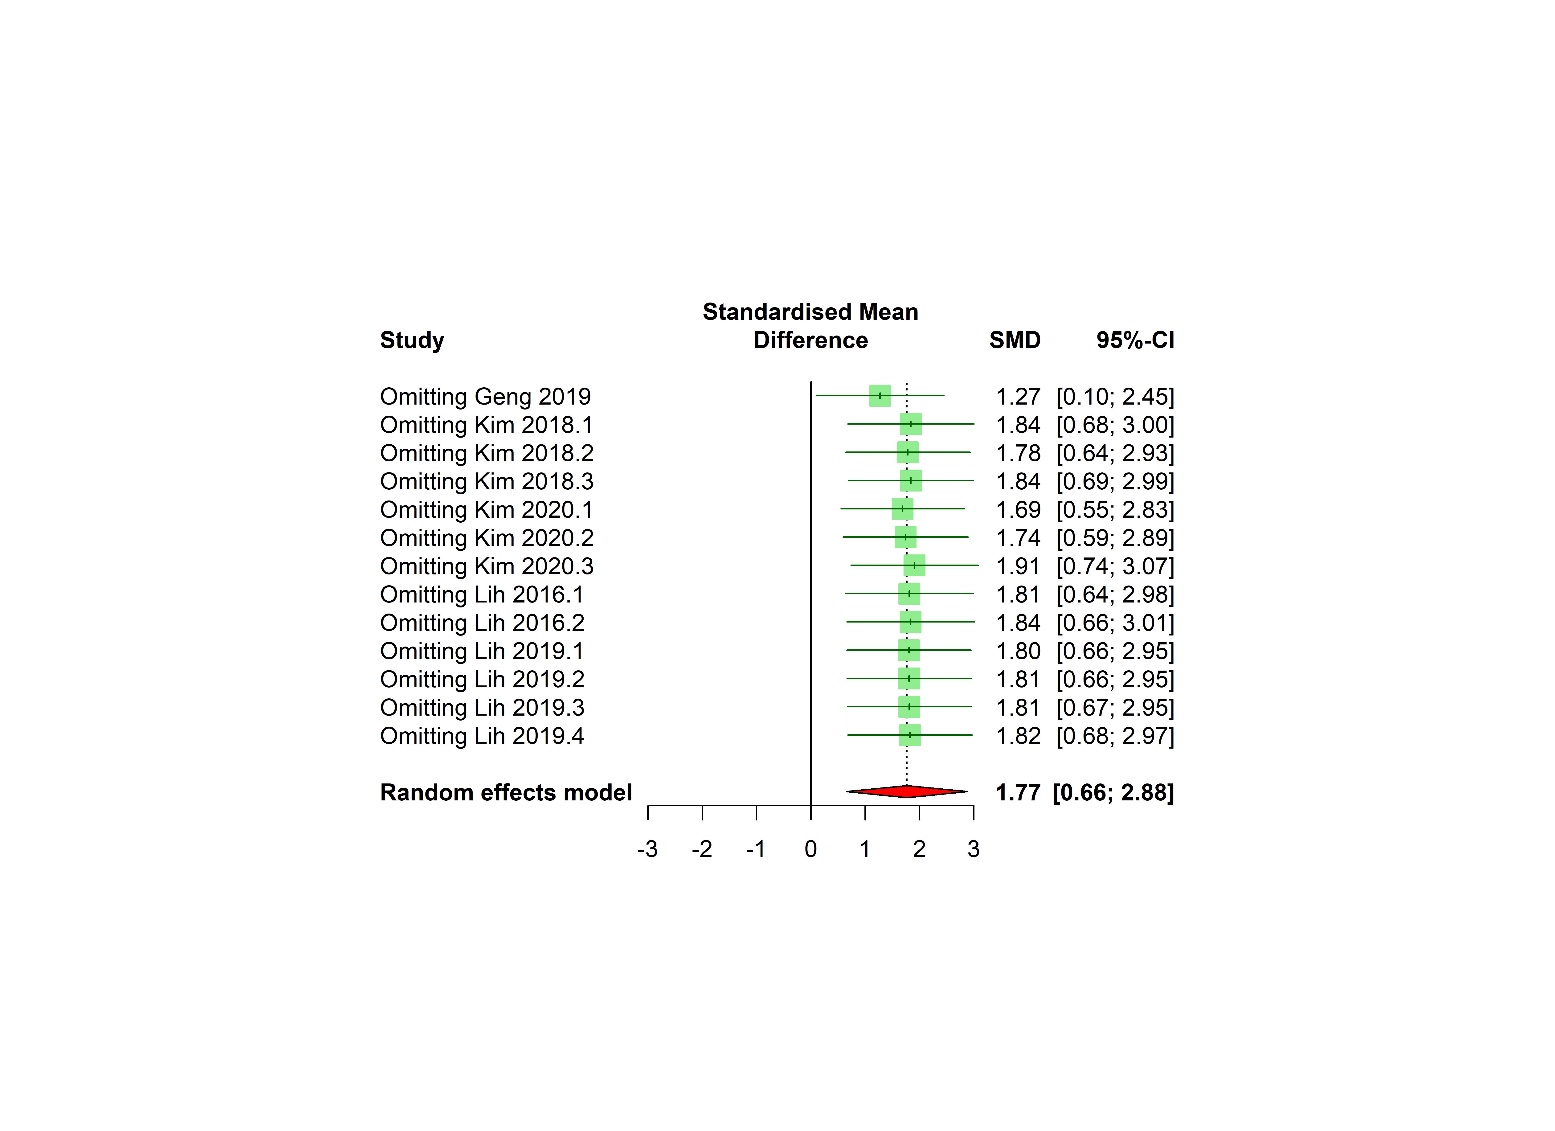
**
